## Uptake of xenobiotic milk induces microRNA profile changes in the neonate intestine

Patrick Philipp Weil<sup>1</sup>, Susanna Reincke<sup>1</sup>, Christian Alexander Hirsch<sup>1</sup>, Federica Giachero<sup>1</sup>, Malik Aydin<sup>1,2</sup>, Jonas Scholz<sup>3</sup>, Franziska Jönsson<sup>3</sup>, Claudia Hagedorn<sup>3</sup>, Duc Ninh Nguyen<sup>4</sup>, Thomas Thymann<sup>4</sup>, Anton Pembaur<sup>1</sup>, Valerie Orth<sup>5</sup>, Victoria Wünsche<sup>1</sup>, Ping Ping Jiang<sup>4,6</sup>, Stefan Wirth<sup>2</sup>, Andreas C. W. Jenke<sup>7</sup>, Per Torp Sangild<sup>4</sup>, Florian Kreppel<sup>3</sup>, Jan Postberg<sup>1,\*</sup>

### E-Mail addresses:

|                            |                                                                                          |
|----------------------------|------------------------------------------------------------------------------------------|
| Patrick Philipp Weil       | <a href="mailto:patrick.weil@uni-wh.de">patrick.weil@uni-wh.de</a>                       |
| Susanna Reincke            | <a href="mailto:susanna.reincke@uni-wh.de">susanna.reincke@uni-wh.de</a>                 |
| Christian Alexander Hirsch | <a href="mailto:christian.hirsch@uni-wh.de">christian.hirsch@uni-wh.de</a>               |
| Federica Giachero          | <a href="mailto:federica.giachero@uni-wh.de">federica.giachero@uni-wh.de</a>             |
| Malik Aydin                | <a href="mailto:malik.aydin@uni-wh.de">malik.aydin@uni-wh.de</a>                         |
| Jonas Scholz               | <a href="mailto:jonas.scholz@uni-wh.de">jonas.scholz@uni-wh.de</a>                       |
| Franziska Jönsson          | <a href="mailto:franziska.joensson@uni-wh.de">franziska.joensson@uni-wh.de</a>           |
| Claudia Hagedorn           | <a href="mailto:claudia.hagedorn@uni-wh.de">claudia.hagedorn@uni-wh.de</a>               |
| Duc Ninh Nguyen            | <a href="mailto:dnn@sund.ku.dk">dnn@sund.ku.dk</a>                                       |
| Thomas Thymann             | <a href="mailto:thomas.thymann@sund.ku.dk">thomas.thymann@sund.ku.dk</a>                 |
| Pingping Jiang             | <a href="mailto:jiangpp3@mail.sysu.edu.cn">jiangpp3@mail.sysu.edu.cn</a>                 |
| Anton Pembaur              | <a href="mailto:anton.pembaur@uni-wh.de">anton.pembaur@uni-wh.de</a>                     |
| Valerie Orth               | <a href="mailto:valerie.orth@helios-gesundheit.de">valerie.orth@helios-gesundheit.de</a> |
| Victoria Wünsche           | <a href="mailto:victoria.wuensche@uni-wh.de">victoria.wuensche@uni-wh.de</a>             |
| Stefan Wirth               | <a href="mailto:stefan.wirth@helios-gesundheit.de">stefan.wirth@helios-gesundheit.de</a> |
| Andreas C. W. Jenke        | <a href="mailto:andreas.jenke@klinikum-kassel.de">andreas.jenke@klinikum-kassel.de</a>   |
| Per Torp Sangild           | <a href="mailto:pts@sund.ku.dk">pts@sund.ku.dk</a>                                       |
| Florian Kreppel            | <a href="mailto:florian.kreppel@uni-wh.de">florian.kreppel@uni-wh.de</a>                 |
| Jan Postberg               | <a href="mailto:jan.postberg@uni-wh.de">jan.postberg@uni-wh.de</a>                       |

<sup>1</sup>Clinical Molecular Genetics and Epigenetics, Faculty of Health, Centre for Biomedical Education & Research (ZBAF), Witten/Herdecke University, Alfred-Herrhausen-Str. 50, 58448 Witten, Germany

<sup>2</sup>HELIOS University Hospital Wuppertal, Children's Hospital, Centre for Clinical & Translational Research (CCTR), Witten/Herdecke University, Heusnerstr. 40, 42283 Wuppertal, Germany

<sup>3</sup>Chair of Biochemistry and Molecular Medicine, Faculty of Health, Centre for Biomedical Education and Research (ZBAF), Witten/Herdecke University, Stockumer Str. 10, 58453 Witten, Germany

<sup>4</sup>Comparative Pediatrics and Nutrition, Department of Veterinary and Animal Sciences, University of Copenhagen, Copenhagen, Denmark

<sup>5</sup>HELIOS University Hospital Wuppertal, Department of Surgery II, Centre for Clinical & Translational Research (CCTR), Witten/Herdecke University, Heusnerstr. 40, 42283 Wuppertal, Germany

<sup>6</sup>School of Public Health, Sun Yat-sen University, Guangzhou, China

<sup>7</sup>Klinikum Kassel, Zentrum für Kinder- und Jugendmedizin, Neonatologie und allgemeine Pädiatrie, Mönchebergstr. 41-43, 34125 Kassel, Germany

\* corresponding author

### Key words

Non-coding RNA, miRNA, intestinal development, neonatology, preterm feeding, necrotizing enterocolitis, NEC, preterm delivery

## **Abstract**

**Objective:** Exclusive breastfeeding is the best source of nutrition for most infants, but it is not always possible. Enteral nutrition influences intestinal gene regulation and the susceptibility for inflammatory bowel disorders, such as necrotizing enterocolitis (NEC). In modern neonatology it is observed that lactase activity increases during intestinal maturation, but formula-fed infants exhibit lower activity levels than milk-fed infants. Since human breast milk has a high microRNA content in comparison to other body fluids, it is controversially discussed whether they could influence gene regulation in term and preterm neonates and thus might vertically transmit developmentally relevant signals.

**Design:** Following their discovery we utilized mammalian taxon-specific milk microRNA as tracers in human and porcine neonates, followed by functional studies in primary human fetal intestinal epithelial cells (HIEC-6).

**Results:** Mammals have in common a significant number of milk microRNAs yet exhibit taxon-specific microRNA fingerprints. We traced intact bovine-specific microRNAs from formula-nutrition in human preterm stool and 9 days after the onset of enteral feeding in intestinal cells of preterm piglets. Few hours after introducing enteral feeding in preterm piglets with supplemented reporter microRNAs (cel-miR-39-5p/-3p), we observed enrichment of the xenobiotic cel-miR in blood serum and in Ago2-immunocomplexes from intestinal biopsies. This points to a transmissibility of milk microRNA signals. We performed Adenovirus type 5-based microRNA-gene transfer into HIEC-6 and examined predicted bovine milk microRNA targets on the protein and transcriptome levels.

**Conclusion:** Results suggest that milk microRNAs could influence gene expression in intestinal epithelia of neonates under special conditions in vitro.

## **Significance of this study**

### **What is already known on this subject?**

- Enteral nutrition influences intestinal gene regulation in neonates, e.g. lactase activity increases during intestinal maturation, but formula-fed infants exhibit lower activity levels than milk-fed infants.
- Human breast milk has a high microRNA content in comparison to other body fluids, thus it is discussed whether microRNAs could influence gene regulation in term and preterm neonates.

### **What are the new findings?**

- Mammals have in common a significant number of milk miRNAs yet exhibit taxon-specific milk miRNA fingerprints.
- Taxon-specific differences were used to trace xenobiotic microRNAs in human preterm neonates, who routinely received formula-supplemented nutrition in addition to breast milk.
- In preterm piglets microRNA stably passed the GI tract and then accumulated in the bloodstream few hours post-feeding.

- Post-feeding reporter microRNAs were loaded to Ago2 in intestinal tissue samples.
- Adenovirus type 5-based bovine microRNA-gene transfer into HIEC-6 revealed deregulated microRNA targets on the protein and transcriptome levels.

#### **How might it impact on clinical practice in the foreseeable future?**

- Our findings provide a line of evidence that a vertical transmission of maternal milk microRNA signals via GI transit to responsive cells and systemic bloodstream distribution is possible. Our discoveries will prompt the understanding about milk microRNA bioactivity with respect to intestinal maturation in term and preterm neonates and help to develop optimized nutritional strategies.

#### **Introduction**

Exploiting xenobiotic milk has a long history in human nutrition since the Neolithic revolution and left marks in contemporary human genomes. Whereas most native European hunter gatherers apparently exhibited lactase (LCT) non-persistence post-weaning, dairy farming practiced by immigrating Neolithic cultures came along with genetic adaptations associated with LCT persistence post-infancy. Apparently, domestication of mammals led to a beneficial niche construction, where those adaptations allowed to exploit xenobiotic milk as additional food source<sup>1-5</sup>. Particularly bovine milk has a global role for human nutrition to date and in addition to fresh milk, industrialized dairy products play an important role in the global market<sup>6</sup>, e.g. in the form of powdered milk or formula nutrition for neonates. In preterm neonates it is observed that LCT activity increases after the begin of enteral feeding with formula-fed infants exhibiting lower lactase activity levels than milk-fed infants<sup>7</sup>. One possible explanation is that milk vs. formula feeding can differently influence the epigenetic LCT regulation. In a preterm piglet model supplementation with formula or bovine colostrum led to differential intestinal gene expression patterns, when compared to total parenteral nutrition<sup>8</sup>. Importantly, enteral feeding influences the risk for necrotising enterocolitis (NEC) in preterm infants. NEC susceptibility increases in premature infants and piglets receiving xenobiotic formula milk when compared to breast milk/colostrum feeding<sup>9-12</sup>. However, the molecular background of nutrition-dependent differences in gene regulation remains concealed.

Whereas the chromatin structure controls transcriptional gene silencing (TGS), post-transcriptional gene silencing (PTGS) utilizes RNA interference (RNAi), sometimes at important nexus in hierarchical gene regulatory networks (Figure S1). RNAi key factors are non-coding microRNAs interacting with Argonaute (Ago) protein family members to target specific mRNAs via base-pairing of their 5'-seed<sup>13-15</sup>. Perfect or near-perfect base-pairing promotes the decay of targeted mRNAs, whereby translational repression seems to be another mechanism of PTGS<sup>16</sup>. In cells, microRNAs fulfil important regulatory functions, but they occur also ubiquitously in body fluids. Among different body fluids, human breast milk seems to exhibit the highest total microRNA concentration<sup>17</sup>. Also,

microRNAs are found in processed milk- products, such as formula milk<sup>18</sup>. There is an ongoing debate in science and society about possible adverse effects of milk consumption with particular emphasis on bovine milk and in some instances focussing the controversy on its microRNAs content<sup>19-21</sup>. But the discussion suffers from a lack of comparative and experimental data about the biological relevance of milk microRNAs. One exception was an elegant approach looking at the intestinal uptake of milk microRNAs in *mmu-mir-375-knockout* and *mmu-mir-200c/141-knockout* mice offspring, which received milk from wild-type foster mothers. Here, no evidence for intestinal epithelial uptake of microRNA and/or its enrichment in blood, liver and spleen was seen<sup>22</sup>. Contradicting results were obtained from another study that simulated infant gut digestion *in vitro* and analysed the uptake of human milk microRNAs by human intestinal epithelial crypt-like cells (HIEC) deriving from foetal intestines at mid-gestation. Here, milk microRNA profiles remained stable after digestion and evidence for the uptake of milk-derived exosomes in HIEC was reported<sup>23</sup>. There is an urgent need for further rigorous experimental data to inspire the debate and address the open problems: Are milk microRNAs functional, or are they a nucleo(t/s)ide source, only? We currently neither know whether milk microRNAs build a path of vertical signal transmission from mother to the newborn nor whether interferences of xenobiotic microRNAs with human target mRNAs can influence developmental pathways<sup>24</sup>. We thus aimed to interrogate the potential relevance of human and xenobiotic milk microRNAs in specific situations in early human life.

## Results and Discussion

We followed the working hypothesis that breast milk microRNAs could fulfil a regulatory signalling function, which could be most important within a discrete perinatal ‘window of opportunity’ during the introduction of enteral feeding, when the infant’s intestine develops as an environment-organism interface to coordinate microbiome homeostasis. Moreover, we considered that intestinal immaturity in preterm neonates could provide a clinically significant niche for (xenobiotic) milk microRNA influence.

### *Mammals have in common a significant number of milk microRNAs yet exhibit species-specific milk microRNA fingerprints*

We determined milk microRNA profiles of human (*hsa*), cattle (*bta*), goat (*cae*), and sheep (*ogm*) to clarify a potential role of microRNA molecules in dietary milk. Furthermore, milk microRNAs from pig (*ssc*), okapi (*ojo*), horse (*eca*), donkey (*eas*), cat (*fca*), and dog (*clu*) were considered to possibly derive an evolutionary context of their profiles, for example putative milk microRNA differences between omnivores, herbivores, and carnivores (Figure 1A). The top 100 milk microRNAs from 21 specimens representing <90% of the total mapped microRNA read counts (92.40-96.39%) were visualized as heat map and dot plot (Figure 1B,C). Across all taxa we detected 1291 hairpin-like pre-

microRNAs (pre-mir), whereby each single pre-mir could potentially give rise to two mature single-stranded mature microRNAs (miR) through processing of its guide (5p) and/or passenger (3p) strand. 139 of these pre-mirs occurred in all taxa.

Robustly, the heat map suggested a stable quantitative distribution of most microRNAs in most species' milk, whereby principal component analyses revealed somewhat separated clusters: Cluster 'blue' contained all human specimens, cluster 'green' contained all herbivores as well as dog, whereas pig and cat appeared somewhat separated (Figure S2). Using ANOVA for deeper investigation of the putative differences between hsa-miRs and bovid miRs, we identified only few significant differences with solely miR-192-5p being  $p < 0.0001$  and 3 miRs being below  $p < 0.05$  (miR-1246, miR-146b-5p, miR-4516). Similarly, few significant differences were seen, when we compared hsa-miRs vs. ssc-miRs, bovid miRs vs. ssc-miRs, omnivores miRs vs. herbivores miRs, omnivores miRs vs. carnivores miRs and herbivores miRs vs. carnivores miRs (Table S1).

Apart, numerous microRNAs were apparently shared by some taxa or occurred taxon-specific. Through their annotations and Blast searches in miRBase<sup>25</sup>, we undertook an approach to systematically identify taxon-specific pre-mir and to analyse their non-overlapping or partially overlapping occurrence in different taxa (Table S2). For each taxon, we identified several hundreds of milk pre-mirs (carnivores:  $n=240$ ; bovids:  $n=521$ ; human:  $n=679$ ; pigs:  $n=272$ ; equids:  $n=381$ ) (Figure 1D). Notably, 225 pre-mir were shared between humans and cattle. We found 440 pre-mir being human-specific, 270 being bovids-specific and many more taxon-specific pre-mir (pigs [ $n=91$ ], equids [ $n=172$ ] and carnivores [ $n=240$ ]). We concluded that xenobiotic microRNAs could be exploited as tracers to study the gastrointestinal (GI) passage as well as systemic and cellular uptake in human or animal models.

#### *Cattle-specific milk microRNA can potentially target human mRNA*

To study the GI passage of milk microRNAs we selected dietary *Bos taurus* (bta)-specific (pre-) microRNAs as tracers. The 50 top-ranked bovid-specific pre-mir were used for heat map illustration (specimens: 8 cattle, 1 yak, 1 water buffalo) (Figure 1E; left column). Further, 11 formula/powdered milk products are shown (compare Table S3A) (Figure 1E; right column). Most bovid-specific pre-mir from liquid milk were present in formula products with similar relative quantities, but mostly with significantly lower total microRNA concentrations in formula (Figure 1F).

For deeper investigation of their putative influence in a human host we selected several bta-miRs using relative quantities and the validated the absence of similar miRs in the human miRNome as the main selection criteria (Figure 1E, red font). Selected bta-microRNA quantities were estimated via their ranks (#n) within *Bos taurus* total microRNAs: bta-mir-2904 (#19); bta-mir-2887 (#67); bta-mir-2478 (#93); bta-mir-3533 (#141); bta-mir-2428 (#169); bta-mir-2440 (#172); bta-mir-677 (#191); bta-mir-2892 (#229); bta-mir-2404 (#232); bta-mir-2361 (#237); bta-mir-2372 (#278); bta-mir-2304 (#284). Typically, human mRNA target prediction for those bta-microRNAs via miRDB<sup>26</sup> revealed

dozens of potential high scoring 3'-UTR targets, with transcripts of several master regulatory genes among them (Table S4). For example, for bta-miR-677-5p (5'-CUCACUGAUGAGCAGCUUCUGAC-3', probable seed-sequence underlined), transcription factor SP4, *zink finger and homeobox family member 1* (ZHX1) and the chromatin remodeller ATRX were among the predicted human mRNA targets (n=655). Importantly, such algorithms usually deliver large numbers of false-positive results, which might be invalid for specific cell types-of-interest. But before interrogating this problem, it is crucial to address whether (xenobiotic) microRNAs stay intact during the gastric and intestinal transit and eventually do reach potential mRNA targets within cells.

#### *Dietary-derived bta-miRs survive gastrointestinal transit in human newborns*

Consistently, we examined a randomly selected preterm neonate stool sample collection from an intensive care neonatology unit. The donors were given routinely formula supplementation (mean gestational age: 29.2 wks [24.4-35.7])<sup>27</sup>. Quantitative real-time PCR (qPCR) analyses were performed using cDNA libraries prepared from purified small RNAs and specific sets of bta-miR or pan-miR primer pairs (Table S3B). As a matter of fact, we detected intact all interrogated bta-miRs in all pre-term stool samples (Figure 2A). This demonstrates that nutritional uptake of milk microRNAs leads to their intestinal enrichment and suggests their stable sequence integrity during gastrointestinal (GI) transit in human preterm neonates.

#### *Xenobiotic microRNAs become enriched in preterm piglets' intestinal cells following 9-days enteral nutrition with bovine colostrum or formula*

We studied intestinal cellular uptake of milk microRNAs in vivo exploiting bovine colostrum or formula derived bta-miRs as tracers in a preterm neonate piglet model wherein the effects of enteral feeding introduction post-delivery are subject of comprehensive ongoing studies<sup>8-12</sup>. Following 9 days of bovine colostrum or formula supplementation after the introducing enteral feeding a protocol for intestinal epithelial cell enrichment was applied prior to microRNA library preparation and deep sequencing. Strikingly, we found 4 bta-miRs, which became enriched within the 50 top-ranked intestinal cellular microRNAs (Figure 3A). Thereby, bta-miR-2904 occupied rank #4 suggesting that a dietary microRNA could in principle reach significant levels if being taken up by cells. Apparently, the rate of cellular uptake was partly influenced by the bta-miR abundance in bovine milk (bta-miR-2904: #4 in intestinal cells (IC) vs. #1 (bta-specific miRs) in bovine milk (BM); bta-miR-2881: #31/not ranked in IC/BM; bta-miR-2892: #37/6 in IC/BM; bta-miR-2887: #39/2 in IC/BM; compare Figure 1E). Apart, we note that for the many microRNAs with identical sequences in different taxa an endogenous or food-derived origin might be impossible to discriminate.

#### *In neonatal preterm piglets feeding with cel-miR-39-5p/-3p-supplemented colostrum bolus leads to bloodstream enrichment of reporter microRNAs*

Following the observation that 9-days-feeding leads to xenobiotic miR enrichment in intestinal cells of neonate piglets, we interrogated whether milk microRNAs could possibly also be involved as regulators in the development of gut homeostasis or other developmental processes, which start perinatally or early postnatally. Therefore, we studied whether and how fast dietary colostrum bolus supplementation with reporter microRNAs (cel-miR-39-5p and cel-miR-39-3p [Figure 3B]) can lead to bloodstream accumulation of xenobiotic cel-miR tracers after GI transit utilizing the preterm piglet model. At different time points post-feeding ( $t_1=30$  min,  $t_2=1$  h,  $t_3=2$  h,  $t_4=3$  h,  $t_5=5$  h and  $t_6=7$  h) peripheral blood was sampled. Then total serum RNA was used for microRNA library preparation and successive analyses of enrichment of both reporter cel-microRNAs by qPCR. MicroRNA-seq was conducted from serum sampled 7 h post-feeding for confirmation. Along most time points of sampling, we did not observe qPCR signals above threshold, but 7 h post feeding the signal for cel-miR-39-3p massively increased (Figure 3B) suggesting the transit of considerable amounts of cel-miR-39-3p from the GI tract into the bloodstream. At this timepoint enrichment was not observed for cel-miR-39-5p. Reads for cel-miR-39-3p could be verified by microRNA-seq, which was reminiscent of the cel-miR-39-3p/5p-bias observed in qPCR analyses before (Figure 3C), but reasons remain unclear. Remarkably, the timing of reporter microRNA accumulation in serum very roughly appeared to be in agreement with GI transit times of radiotracers in suckling piglets (21 days old; approx. 1.5-3.5 h until 75% of gastric emptying and >9.5 h until 75% intestinal emptying)<sup>28</sup>.

#### *Dietary supplemented cel-miR-39-5p and cel-miR-39-3p co-precipitate with Ago2*

The biological activity of microRNAs requires their loading into Ago2-containing protein complexes. We analysed whether cel-miR-39-5p/-3p microRNAs can be pulled-down from piglet intestinal biopsies 7h post-feeding using the anti-pan-Ago2 monoclonal antibody (Sigma-Aldrich, MABE56, clone 2A8). Both cel-miR-39-5p as well as cel-miR-39-3p could be detected in Ago2-precipitates from pre-term piglets, which were fed with reporter-microRNA-supplemented colostrum, suggesting that Ago2 in intestinal cells can be loaded with both the guide and the passenger strands resulting from processed cel-mir-39 (Figure 3D). Remarkably, the stronger signal for cel-miR-39-3p was reminiscent of its predominant enrichment in the bloodstream 7h post-feeding. Due to the presence of positive cel-miR-39-5p qPCR signals in Ago2-immunocomplexes we assume that its bloodstream enrichment could simply lag behind cel-miR-39-3p instead of being selectively excluded.

#### *Weak evidence for DDX3 targeting through bta-mir-677 in HIEC-6 cells is superimposed by several probable false-positive predictions of microRNA-mRNA interactions*

If anticipating a vertical transmission of PTGS via milk microRNAs, the superordinate problem is which mRNAs are true targets. Clearly, target prediction depending mostly of 5'-seed complementarity remains leaky for simple reasons: First, because searches for sequence matches in mRNA databases usually cannot consider whether a potential target is transcribed in a cell or tissue-

of-interest or not. Second, prediction algorithms do not consider that within a cell different microRNAs and mRNAs compete for being loaded to a limited number of Argonaute (Ago) proteins<sup>29</sup>. Moreover, given that mRNA decay and blocking of translation exist as alternative microRNA interference mechanisms, it is not clear whether PTGS can be detectable directly on the mRNA level and/or the protein level only. Consequently, the identification of valid microRNA-target interactions and their influence on gene regulatory networks requires detailed experimental analyses.

We thus studied the potential influence of bta-mir-677 on bioinformatically predicted human targets in primary foetal human intestinal epithelial cells (HIEC-6) using adenovirus type 5 (Ad5)-based microRNA gene transfer. Using this transduction method, we efficiently overcame the disadvantageous signal-to-noise ratio of standard transfection protocols (Figure S3). Transcriptome profiling confirmed that this model well fulfilled important criteria for the purpose of microRNA experiments in non-transformed cells, which retained foetal epithelial cell characteristics under primary cell culture conditions and under the influence of Ad5-mediated microRNA transfer (Figure 4A). From the list of predicted human mRNA targets of bta-miR-677-5p, we selected ATRX, DDX3, PLCXD3 and ZHX1 for analyses by immunofluorescence microscopy and quantitative Western blots (Figure 4B,C). These targets had a high miRDB scores, and they were annotated being potential master regulatory genes. However, from this unavoidably arbitrarily selection, none of the candidates exhibited differences in the quantity or subcellular distribution using microscopy (Figure 4B). On the scale of whole cell populations, we conducted quantitative Western blot analyses. Interestingly, for DDX3, analyses of two Western blots revealed a 24.45% reduction (SD:  $\pm 1.68\%$ ) of DDX3 signals in bta-mir-677-treated vs. wild-type and a 37.90% (SD:  $\pm 1.90\%$ ) DDX3 signal reduction in bta-mir-treated vs. ctrl-mir-treated HIEC-6. These results suggested that bta-mir-677 expression in HIEC-6 cells could indeed influence the expression of one of the predicted human mRNA targets, leading to reduced translated DDX3 protein. Even though the latter observation could give some hint for an influence of bta-miR-677-5p in HIEC-6 cells, the relative arbitrary putative target selection and laborious validation is unrewarding and non-holistic.

We therefore analysed the influence of Ad5-mediated microRNA gene transfer using four different bovine microRNAs-of-interest (miRoI) (bta-miR-677-5p, bta-miR-2404-5p, bta-miR-2440-3p and bta-miR-2361). We determined the fold-changes of all transcribed genes in miRoI-treated cells with reference to non-sense miR-treated HIEC-6. For comparison, we then focussed our analyses on all expressed predicted target genes of each miRoI with reference to non-sense miR-treated HIEC-6 (Figure 4D). Whereas most genes remained unaffected by miRoI-treatment, we observed numerous significant cases of downregulation within the group of predicted miRoI targets (Median fold-changes all transcripts/predicted targets: bta-miR-677-5p: 0.9908/0.8147 [ $p < 0.0001$ ]; bta-miR-2404-5p: 0.9805/0.9587 [ $p = 0.0032$ ]; bta-miR-2440-3p: 1.0070/0.9728 [ $p = 0.0240$ ]; bta-miR-2361-5p: 1.0340/0.9361 [ $p < 0.0001$ ]), whereby we did not see any correlation between the degree of observed downregulation and the individual position/score as a result of target predictions.



Taken together, our experimental trajectory suggests that dietary uptake of milk microRNAs can lead to their loading to Ago2 in neonatal intestinal epithelial cells. Thus, vertical transmission of maternal milk microRNA signals via GI transit to responsive cells and systemic bloodstream distribution is apparently possible. This is in agreement with the ‘functional hypothesis’, but contradicts the ‘non-functional’ hypothesis that milk microRNAs could solely serve as a nucleoside source for the newborn<sup>30</sup>. Our results from tracer experiments provide good experimental justification to address superordinate questions about milk microRNA-induced PTGS in neonates. However, basic key problems remain and should be addressed: We have no idea, which of the hundreds of different microRNAs found in milk with different abundance could be important and how selective loading of Ago2 in milk microRNA-responsive cells could work. Possibly, only some specific microRNAs find specific mRNA duplex partners, depending on their presence in specific cell types and transcriptional timing. Systemically, it remains unknown how far-reaching milk microRNAs’ influence could be. Could biologically relevant microRNA accumulation be restricted to the intestine, or does their observation in the bloodstream indicate a systemic distribution to other target tissues/cells? As important as the place of milk microRNA activity is the time of action during ontogeny. Most convincing could be the existence of a relatively narrow ‘window of opportunity’, which could open perinatally and could persist during the introduction of enteral feeding, when the infant’s intestine develops as an environment-organism interface to coordinate microbiome homeostasis. In HIEC-6, we have efficiently applied Ad5-mediated gene transfer, establishing continuous, but probably non-natural cellular levels of ectopically expressed microRNAs. This might lead to enforced Ago2-loading caused by outnumbered availability of the substrate (dog-eat-dog effect). These conditions may not fully reflect the in vivo situation in the neonate intestine, but nevertheless might be useful to study the influence of (xenobiotic) milk microRNAs on gene regulatory networks. This approach could plausibly help to explain the observed increase of severe intestinal complications such as NEC in premature infants fed with bovine based formula milk. However, we clearly emphasize that postulating potential harmful influence would be an overstated conclusion from our experiments. But for the first time in human history, the newest developments in intensive care neonatology allow the survival of extremely vulnerable preterm neonates, whereby severe complications are often associated with incomplete intestinal development. Thus, if the ‘window of opportunity’ hypothesis discussed above holds, the consideration of xenobiotic milk microRNA side effects on early preterm and term neonatal development seems well justified and would encourage advanced future studies.

## **Methods**

### Argonaute co-immunoprecipitation (Co-IP)

Association of reporter cel-miR-39 co-fed with milk with Argonaute (Ago2) in piglet intestinal biopsies was analysed using co-immunoprecipitation and qPCR. For native pan-Ago2 precipitation from intestinal tissue we used monoclonal mouse anti-pan-Ago2 antibodies (Sigma-Aldrich, MABE56, clone 2A8) similarly as described previously<sup>31</sup>. This antibody exhibits cross-species reactivity with Ago2 from mouse, humans, and most probably from other mammals as well. After final blood sampling 7-7.5 h post-feeding proximal and distal tissues were taken at euthanasia, deep frozen at -20°C and shipped on dry ice. Prior to immunoprecipitation piglet intestinal tissue from a liquid nitrogen storage tank was powdered using a Cellcrusher™ (Cellcrusher, Co. Cork, Ireland) pre-chilled in liquid nitrogen. Subsequently, intestinal tissue powder was suspended in lysis buffer (20 mM Tris-HCl, pH7.5, 200 mM NaCl, 2.5 mM MgCl<sub>2</sub>, 0.5% Triton X-100). Samples were incubated overnight with 3 µg anti-pan-Ago (2A8) and 25 µL magnetic protein A beads (Diagenode). Following the enrichment of immunocomplexes on a magnetic rack and several washes with PBS, the samples were heated to 95°C for 15 min, and then RNA was purified from the immunocomplexes using Trizol and isopropanol precipitation. Then RNA converted into cDNA libraries and cel-miR-39-5p/-3p were analysed from cDNA libraries by qPCR.

#### Cell culture and Ad5 transduction

Human intestinal epithelial cells (HIEC-6 [ATCC CRL-3266]) cells were cultured upon manufacturer's recommendations. Flow cytometric analyses of HIEC-6 cells transduced with different ranges of multiplicity of infection (MOI) were used to define a transduction efficiency and to determine the optimal MOI (Figure S3). Considering transduction efficiency and compatibility, we subsequently used MOI 10.000 in experimental routine. One day pre-transduction, 10<sup>6</sup> HIEC-6 cells were seeded in 6-well cell culture dishes. The following day, cells were washed with PBS, provided with fresh medium and subsequently transduced with respective Ad5 vector particles. Cells were harvested 96 h post-transduction. The expression of bta-mir-677-like hairpins, bta-miR-677-5p and bta-miR-677-3p, respectively, was validated using the Mir-X™ miRNA First Strand Synthesis Kit (Takara) in combination with qPCR. The results confirmed the expression of bta-mir-677-like hairpins, bta-miR-677-5p, but a bias for bta-miR-677-3p suggesting preferential processing of the 5-p guide strand (Figure S5). For Western blot analyses cell pellets were homogenized in RIPA buffer (50 mM Tris HCl pH 8.0, 150 mM NaCl, 1% NP-40, 0,5% sodium deoxycholate, 0,1% SDS plus cComplete™ Mini Protease Inhibitor Cocktail [Sigma-Aldrich]). Alternatively, cells were grown on coverslips for immunofluorescence microscopy. Here, after Ad5-mediated microRNA transfer successful expression of the microRNA transgene could be indirectly confirmed using immunofluorescence microscopy and flow cytometry for detection of green fluorescent protein (GFP) that was co-expressed with bta-mir-677-like hairpins from the same transcript.

#### Deep sequencing of microRNAs (microRNA-seq) and bioinformatics pipeline

Small RNAs (18-36 nt) were purified from total RNA using polyacrylamide gel electrophoresis (PAGE). The subsequent cDNA library preparation utilizes a four-step process starting with the ligation of a DNA oligonucleotide to the 3'-end of the selected small RNAs, followed by ligation of a RNA oligonucleotide to the 5'-end of the selected small RNAs. The resulting molecules were transcribed via reverse transcription (RT) and amplified via PCR<sup>32</sup>. Subsequently, after final quality checks by microcapillary electrophoresis and qPCR, the libraries were sequenced on an Illumina HiSeq 2000 platform (single end, 50 bp). This work has benefited from the facilities and expertise of the high throughput sequencing core facility of I2BC (Research Center of GIF – <http://www.i2bc.paris-saclay.fr/>). The initial data analysis pipeline was as follows: CASAVA-1.8.2 was used for demultiplexing, Fastqc 0.10.1 for read quality assessment and Cutadapt-1.3 for adaptor trimming, resulting in sequencing reads and the corresponding base-call qualities as FASTQ files. File conversions, filtering and sorting as well as mapping, were done using 'Galaxy'<sup>33-35</sup>, a platform for data intensive biomedical research (<https://usegalaxy.org/>), or 'Chimira'<sup>36</sup>, sRNAtoolbox<sup>37</sup> or 'miRBase'<sup>25</sup>, respectively. For selected bta-mir we used the miRDB custom option for sequence-based prediction of potential human mRNA targets<sup>26</sup>.

#### Deep sequencing of messenger RNAs (mRNA-seq) and bioinformatics pipeline

Total RNA was purified from Ad5-transduced HIEC-6 cells expressing a nonsense-miR or bta-miRs using Trizol reagent (Sigma, MO, USA) upon manufacturer's recommendations. RNA quality and quantity were assessed by microcapillary electrophoresis using an Agilent Bioanalyzer 2100. All specimens had a RIN between 8.9 and 9.2 and were subsequently used for sequencing library preparation. Enrichment of mRNAs was done using the NEBNext Poly(A) mRNA Magnetic Isolation Module (New England BioLabs, #E7490S) upon manufacturers' recommendations. Subsequently cDNA libraries were prepared using the NEBNext Ultra II DNA Library Prep Kit for Illumina (New England BioLabs, #E7645S) upon manufacturers' recommendations in combination with NEBNext Multiplex Oligos for Illumina (Index Primer Set 1) (New England BioLabs, #E7335G). Before multiplexing, library quality and quantity were assessed by microcapillary electrophoresis using an Agilent Bioanalyzer 2100. Deep sequencing was done using an Illumina HiSeq2500. The initial data analysis pipeline was as follows: CASAVA-1.8.2 was used for demultiplexing, Fastqc 0.10.1 for read quality assessment and Cutadapt-1.3 for adaptor trimming, resulting in sequencing reads and the corresponding base-call qualities as FASTQ files. File conversions, filtering and sorting as well as mapping, were done using 'Galaxy'<sup>33-35</sup> (<https://usegalaxy.org/>), serially shepherding the FASTQ files through the following pipeline of tools: 1. FASTQ groomer (Input: Sanger & Illumina 1.8+ FASTQ quality score type)<sup>38</sup>; 2. TopHat for gapped-read mapping of RNA-seq data using the short read aligner Bowtie2 (Options: single end, Homo sapiens: hg38) resulting in a BAM formatted accepted hits file<sup>39</sup>. 3. featureCounts to create tabular text file (Output format: Gene-ID "\t" read-count [MultiQC/DESeq2/edgeR/limma-voom compatible]). 4. Prior to DESeq2 normalization, a

tabular file containing catalogued columns of read counts for all experiments was arranged in Microsoft Excel for Mac 16.32. and then uploaded as a tabular text file to Galaxy. 5. annotadeMyIDs was used to assign gene symbols and gene names to Entrez IDs. Biostatistical tests were carried out using GraphPad Prism 8.4.3 software.

A detailed description of materials and methods can be found in the [online supplemental material](#).

## **Declarations**

### **Ethics approval and consent to participate**

This study was conducted with approval of the Witten/Herdecke University Ethics board (No. 41/2018). All animal procedures were approved by the National Council on Animal Experimentation in Denmark (protocol number 2012-15-293400193). The authors state that they have obtained appropriate institutional review board approval or have followed the principles outlined in the Declaration of Helsinki for all human or animal experimental investigations. In addition, for investigations involving human subjects, informed consent has been obtained from all participants.

### **Consent for publication**

Not applicable.

### **Availability of data and materials**

The datasets generated and/or analysed during the current study are available in the NCBI BioProject repository as fastq.gz files of microRNA-seq and mRNA-seq (SubmissionIDs: SUB7584111/ SUB9897357/BioProject ID: PRJNA740153/URL: <https://www.ncbi.nlm.nih.gov/bioproject/740153>).

### **Competing interests**

All authors declare that there is no conflict of interests.

### **Funding**

This study was funded by the HELIOS Research Centre (JP) and the NEOMUNE research program (PTS) from the Danish Research Councils. University of Copenhagen has filed a patent concerning the use of bovine colostrum for groups of paediatric patients. The authors have no other relevant affiliations or financial involvement with any organisation or entity with a financial interest in or financial conflict with the subject matter or materials discussed in the manuscript apart from those disclosed. No writing assistance was utilised in the production of this manuscript.

### **Authors' contributions**

JP and PPW designed the study and wrote the paper. SR conducted Ad5-mediated microRNA gene transfer experiments under supervision and with the help of FK, FJ and CH. Further, she prepared mRNA-seq libraries. FK and JS developed the Ad5-mediated microRNA gene transfer. CAH traced microRNAs in piglet blood and intestine and human stool. MA, AP and VO performed luciferase experiments. Animal treatments as well as sample collection and preparation were done by DNN, PPJ and PTS. PPW, FG, TT, MA, ACWJ and SW contributed to sampling of human and animal milk specimens. PPW, FG, VW and CAH generated RNA libraries, conducted qPCR experiments and NGS. JP and CAH performed Argonaute pull-down experiments. JP and PPW supervised undergraduates and graduate students. JP supervised the study, analysed the data and wrote the manuscript with the help of PPW, ACWJ, CH and FK.

### **Acknowledgements**

We gratefully acknowledge Gilles Gasparoni (Institut für Genetik/Epigenetik, Universität des Saarlandes, Germany) to enable and support our mRNA deep sequencing analyses under hard conditions during the first European peak period of the SARS-CoV-2 pandemic. We further thank Dr. Arne Lawrenz (director of Wuppertal Zoo) for providing Okapi (Lomela's) milk.

## Figures and legends

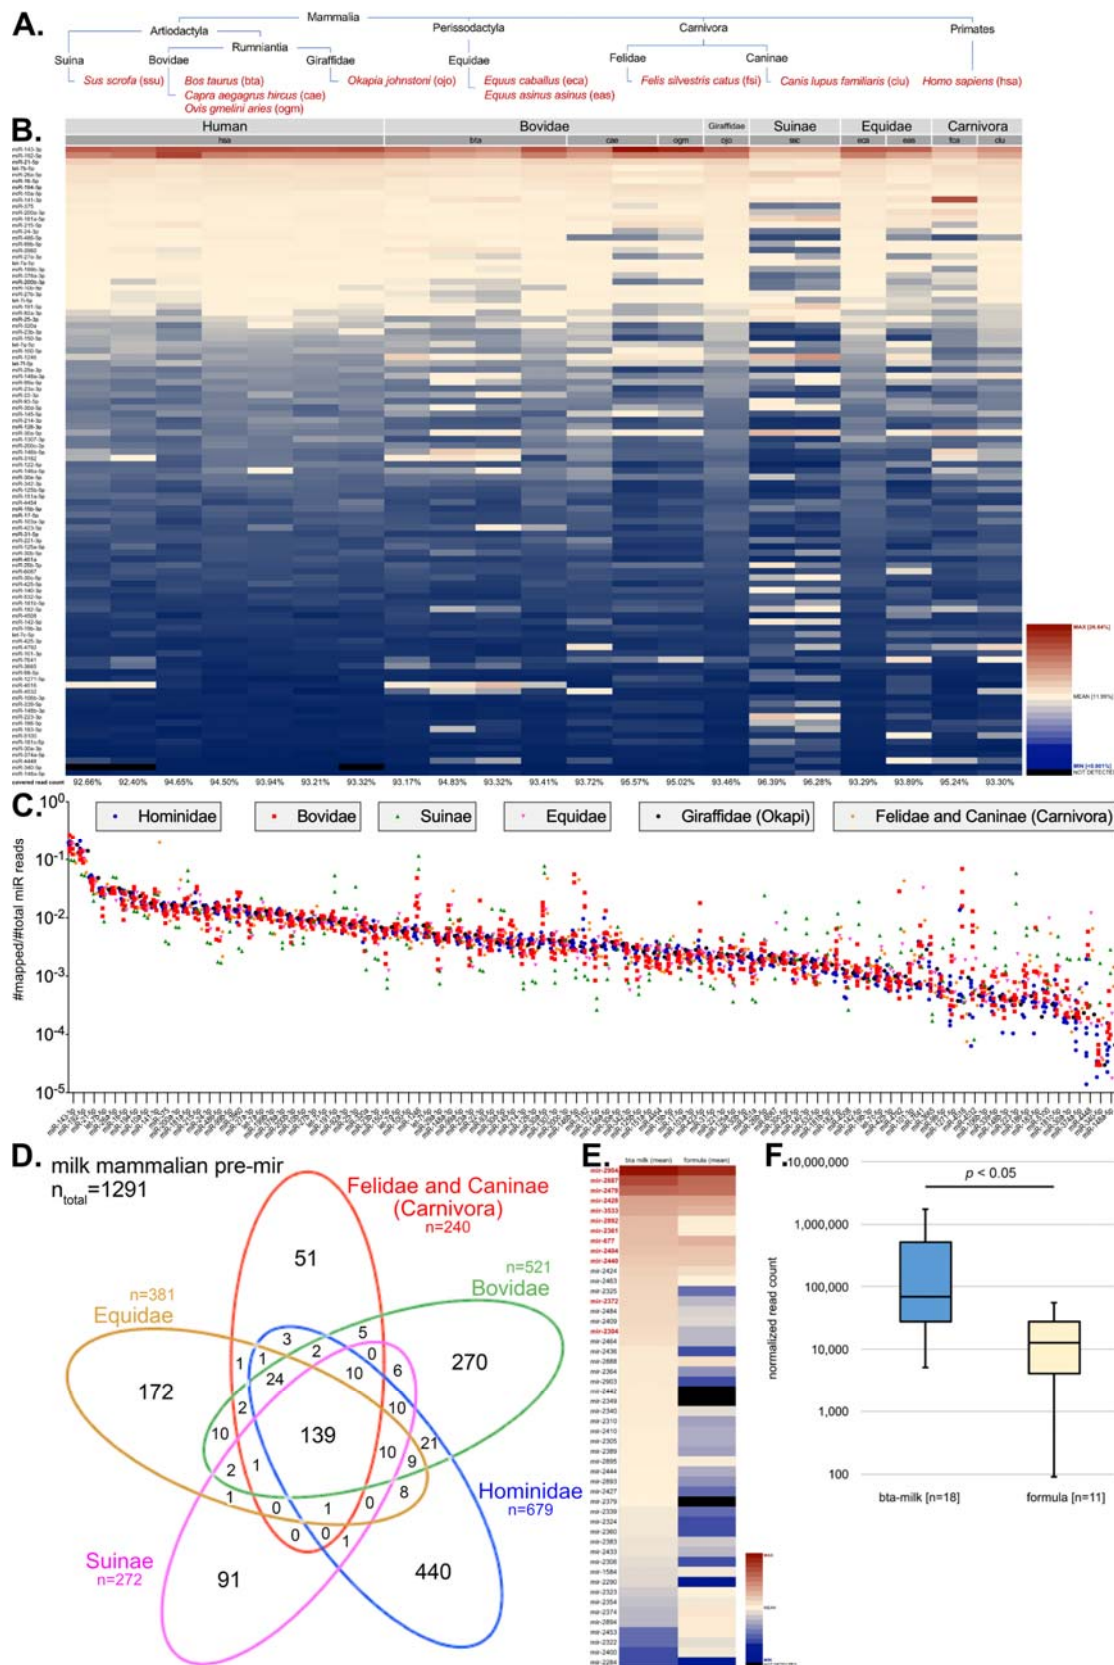

**Figure 1.** *Comparative profiling of mammalian milk microRNAs.* **A.** Phylogenetic tree of specimens under analysis (red font), which included mostly domesticated species with the exception of okapi (ojo) and human (hsa). Additionally, we determined microRNA profiles from yak cheese and water buffalo cheese (light red font), which are part of the available dataset, but are not part of the below analyses due to insufficient total read counts and quality. **B.** Heat map of microRNAs conserved in all taxa analysed. Only the top 100 microRNAs found in all species are shown robustly representing over 90% of the total read count in all specimens (see values below each column). A colour gradient was used for the visualisation of each microRNA's abundance (read counts per million; CPM) in each specimen. MicroRNAs were sorted in descending order with reference to the median CPM of human specimens. **C.** The chart illustrates the quantitative distribution of the same top 100 microRNAs shown in the above heat map. **D.** Venn diagram showing that the numbers of pre-microRNAs (pre-mir) shared by all or some taxa or, respectively, which were identified being taxon-specific. For this analysis pre-mir counts were used rather than miR-counts to counteract a potential differential taxon-specific 5p-/3p-dominant processing. **E.** Heat map of the top 50 *Bos taurus* (bta)-specific pre-mir in raw and industrially processed milk specimens (n=18) in comparison with powdered milk/formula product specimens (n=11). The median CPM (mapped reads count per million) was used as sorting criterion in descending order. Red font: microRNA was used for human mRNA target prediction via the sequence-based custom prediction option of miRDB<sup>26</sup>. Cave! Bovidae in heat map include goat and sheep, whereas ranks were determined from cattle only. **F.** Quantitative analysis of total microRNA read counts in raw and industrially processed milk specimens (n=18) in comparison with powdered milk/formula product specimens (n=11).

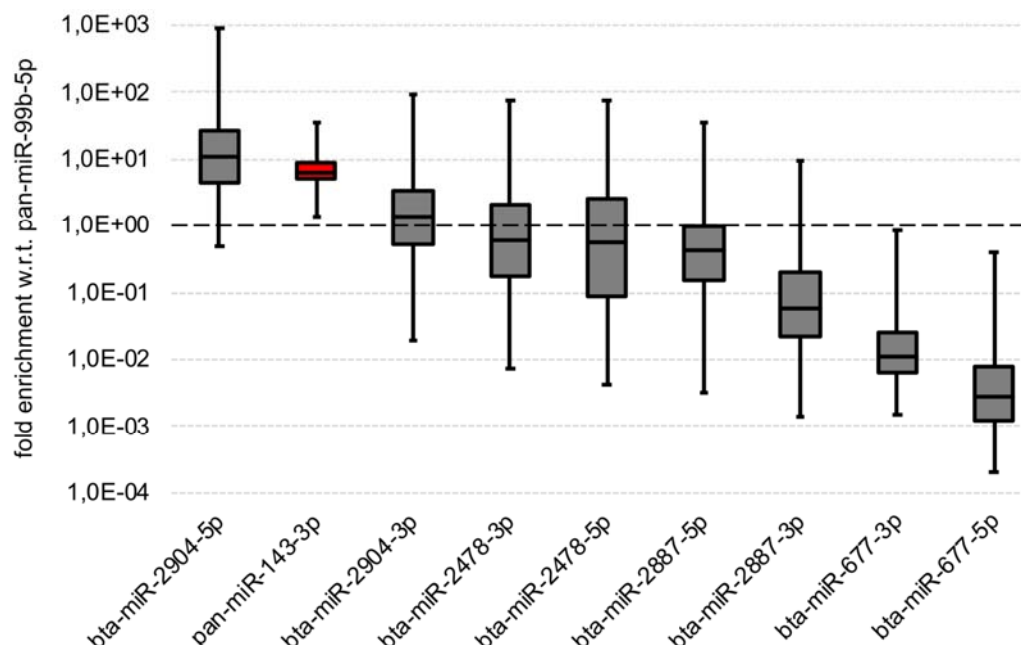

**Figure 2.** Xenobiotic bta-miRs survive the gastrointestinal passage in preterm neonates. **A.** Results of qPCR for selected bta-miRs. For comparison, pan-miR-143-3p shared by humans and cattle is shown (red box). The relative enrichment was normalized with respect to pan-miR-99b-5p.



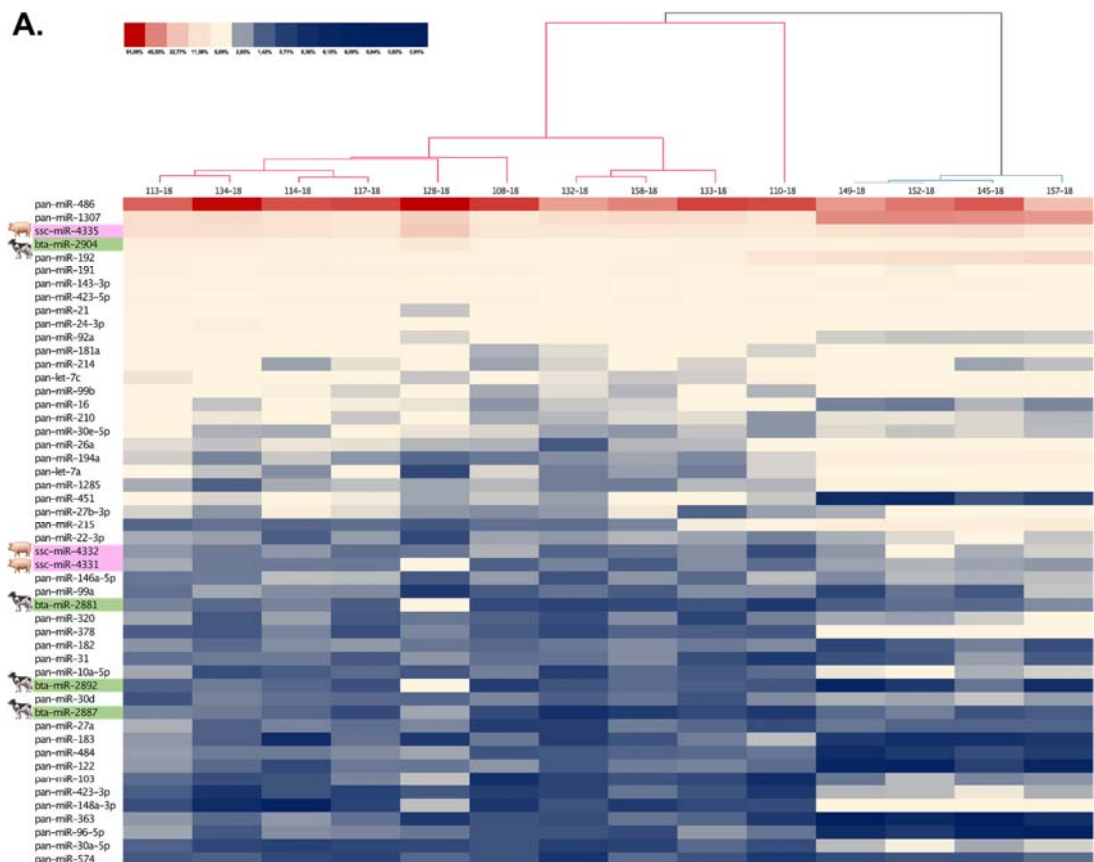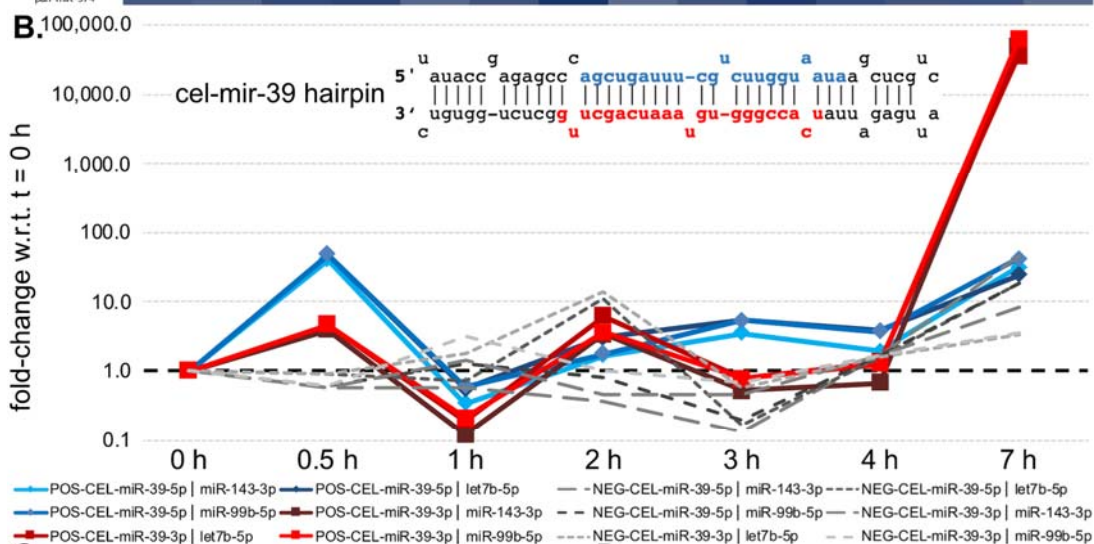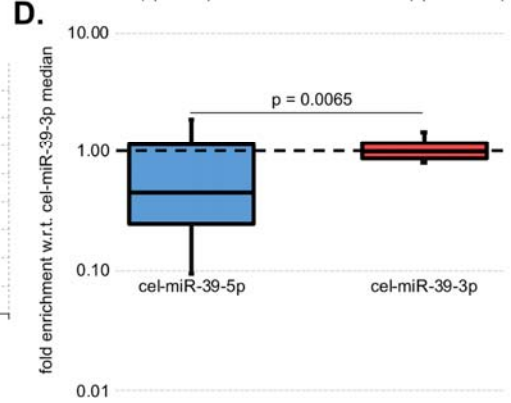

**Figure 3.** Reporter *cel-miR-39-3p* accumulates in the bloodstream and *cel-miR-39-5p/-3p* co-precipitate with Argonaute/Ago2 from homogenized intestinal biopsies. **A.** Heat map of microRNAs detected in enriched porcine preterm neonatal intestinal cells following 9 days of enteral bovine colostrum/formula supplementation. Only the top 50 microRNAs found in all species are shown. A colour gradient was used for the visualisation of each microRNA's abundance (read counts per million; CPM) in each specimen. MicroRNAs were sorted in descending order with reference to the median CPM of all specimens. **B.** *C. elegans* (*cel*)-mir-39 hairpin. Prospective guide and passenger strands are highlighted for *cel-miR-39-5p* (blue) and *cel-miR-39-3p* (red). **C.** Results of qPCR. Normalization of *cel-miR-39-5p* and *cel-miR-39-3p* was performed using endogenous pan-miR-143-3p, pan-miR-99b-5p or pan-let-7b-5p, respectively. Blue curves: *cel-miR-39-5p* (POS; *cel-miR-39* feeding); red curves: *cel-miR-39-3p* (POS; *cel-miR-39* feeding); grey curves: (NEG; no *cel-miR-39* supplementation). **D.** Using Chimira<sup>36</sup> for analysis of small RNA sequencing raw data from piglet blood serum microRNAs and selection '*C. elegans*' as species option, we identified *cel-miR-39-3p* (avg. 95 raw read counts). For comparison, matching *cel-let-7-5p* (avg. 2145 raw read counts, sequence identity to *ssc-let-7a-5p* [nt 1-22]) and *cel-miR-72-5p* (avg. 22 raw read counts, probably being identified as *ssc-miR-31-5p* [1nt mismatch]) are shown as well as ambiguous matches for *cel-miR-5592-3p* (avg. 17 raw read counts) and *cel-miR-1818* (avg. 5 raw read counts). Notably, the charts y-axis is DESeq2 normalized read counts. **E.** Results of qPCR after Argonaute pull-down using monoclonal mouse pan-argonaute/Ago2 antibodies (Sigma-Aldrich, MABE56, clone 2A8<sup>31</sup>) and detection of reporter miRs by qPCR from microRNA libraries prepared from co-precipitated small RNAs.

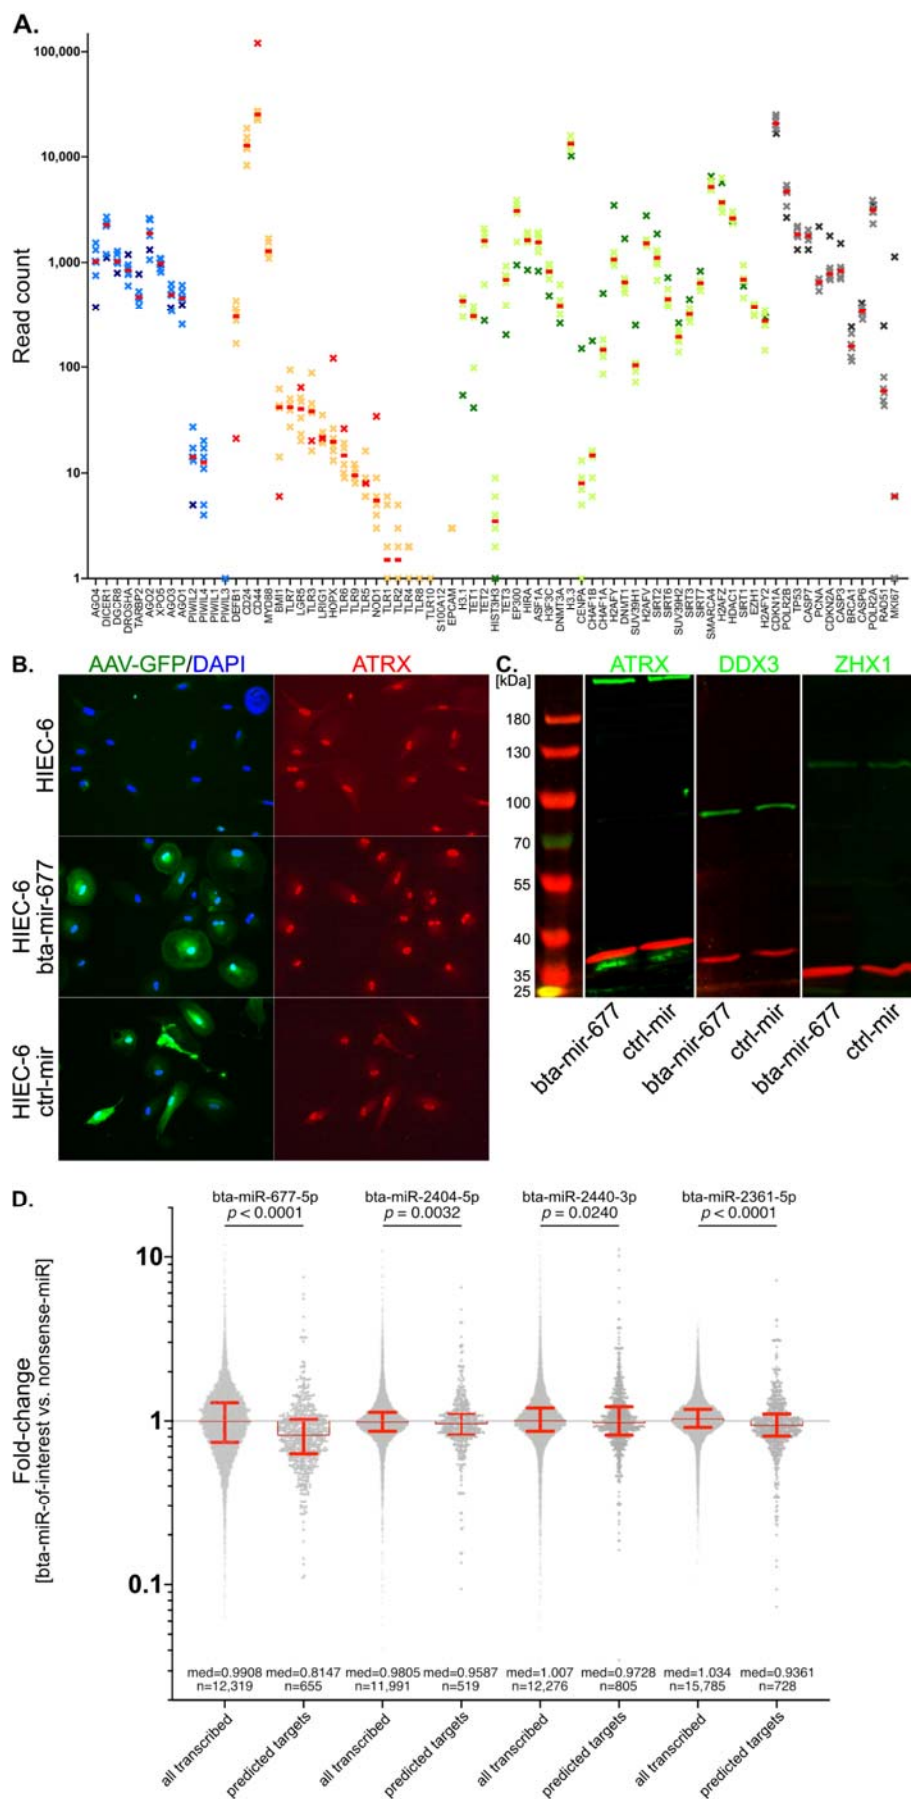

**Figure 4.** Tests for the suppression of predicted human mRNA targets of bta-miR-677 on the protein level for selected candidates and for 4 bta-miRs on the whole transcriptome level. **A.** Mapped raw read counts reflect HIEC-6 gene expression profiles. Selected groups of genes are shown: gene expression related to microRNA biogenesis and RNAi activity (blue asterisks), intestinal epithelial cell markers and innate immunity gene expression (orange asterisks); DNA methylation and chromatin structure related gene expression (green asterisks); cell cycle and proliferation related gene expression (grey asterisk). Untreated HIEC-6 are highlighted in each data column through darker coloured asterisks. Each red line marks the median read count for each data column. **B.** Immunofluorescence microscopy revealed no differences in the nuclear localisation of ATRX upon Ad5-mediated bta-miR-677 gene transfer into primary HIEC-6 cells. ATRX predominantly exhibited nuclear localisation and therein we observed focal accumulations in wt-HIEC-6 as well as in bta-mir-677-treated HIEC-6 and ctrl-mir-treated HIEC-6. We routinely focussed our view to areas wherein cells exhibited GFP-signals of different intensity. This should enable us to detect differences in ATRX distribution, which hypothetically could depend on the level of expressed bta-mir-677. Again, no differences were seen between treated cells and untreated controls. Notably, for PLCXD3 no reliable signals were observed in HIEC-6 cells at all. **C.** When normalized with the GAPDH, no differences in the abundances of ATRX or ZHX1 were observed upon Ad5-mediated bta-miR-677 gene transfer into primary HIEC-6 cells in Western analyses, when compared to wild-type (wt) HIEC-6 (not shown) or HIEC-6 expressing a control-mir. Using two replicative measurements for quantitative Western Blot analyses via LI-COR Empiria Studio Software, we measured a 24.45% (SD:  $\pm 1.68\%$ ) DDX3 signal reduction in bta-mir-677-treated vs. wt and, respectively, a 37.90% (SD:  $\pm 1.90\%$ ) DDX3 signal reduction in bta-mir-treated vs. ctrl-mir-treated HIEC-6. **D.** Effects of Ad5-mediated expression of 4 selected bta-miRs were studied in HIEC-6 (bta-miR-677-5p; bta-miR-2404-5p; bta-miR-2400-3p; bta-miR-2361-5p) in comparison to HIEC-6 expressing a Ad5-mediated nonsense-miR. Relative fold-changes were compared for the whole HIEC-6 transcriptome and the lists of expressed predicted targets. Predicted targets for each bta-miR comprised of hundreds of mRNAs (i.e. bta-miR-677-5p [n=655]; bta-miR-2404-5p [n=519]; bta-miR-2400-3p [n=805]; bta-miR-2361-5p [n=728]). Statistical power calculations were done using the nonparametric Wilcoxon–Mann–Whitney method and GraphPad Prism 8.4.3 software.

## References

1. Brandt G, Szecsenyi-Nagy A, Roth C, et al. Human paleogenetics of Europe--the known knowns and the known unknowns. *J Hum Evol* 2015;79:73-92. doi: 10.1016/j.jhevol.2014.06.017 [published Online First: 2014/12/04]
2. Gerbault P. The onset of lactase persistence in Europe. *Hum Hered* 2013;76(3-4):154-61. doi: 10.1159/000360136 [published Online First: 2013/01/01]
3. Segurel L, Bon C. On the Evolution of Lactase Persistence in Humans. *Annu Rev Genomics Hum Genet* 2017;18:297-319. doi: 10.1146/annurev-genom-091416-035340 [published Online First: 2017/04/21]
4. Beja-Pereira A, Luikart G, England PR, et al. Gene-culture coevolution between cattle milk protein genes and human lactase genes. *Nat Genet* 2003;35(4):311-3. doi: 10.1038/ng1263 [published Online First: 2003/11/25]
5. Gerbault P, Liebert A, Itan Y, et al. Evolution of lactase persistence: an example of human niche construction. *Philos Trans R Soc Lond B Biol Sci* 2011;366(1566):863-77. doi: 10.1098/rstb.2010.0268 [published Online First: 2011/02/16]
6. Nuñez M. Existing Technologies in Non-cow Milk Processing and Traditional Non-cow Milk Products. In: Tsakalidou E, Papadimitriou K, eds. *Non-Bovine Milk and Milk Products*: Academic Press 2016:161-85.
7. Shulman RJ, Schanler RJ, Lau C, et al. Early feeding, feeding tolerance, and lactase activity in preterm infants. *J Pediatr* 1998;133(5):645-9. doi: 10.1016/s0022-3476(98)70105-2 [published Online First: 1998/11/20]
8. Willems R, Krych L, Rybicki V, et al. Introducing enteral feeding induces intestinal subclinical inflammation and respective chromatin changes in preterm pigs. *Epigenomics* 2015;7(4):553-65. doi: 10.2217/epi.15.13 [published Online First: 2015/06/26]
9. Bjornvad CR, Schmidt M, Petersen YM, et al. Preterm birth makes the immature intestine sensitive to feeding-induced intestinal atrophy. *Am J Physiol Regul Integr Comp Physiol* 2005;289(4):R1212-22. doi: 10.1152/ajpregu.00776.2004 [published Online First: 2005/06/18]
10. Lin PW, Stoll BJ. Necrotising enterocolitis. *Lancet* 2006;368(9543):1271-83. doi: 10.1016/S0140-6736(06)69525-1 [published Online First: 2006/10/10]
11. Moller HK, Thymann T, Fink LN, et al. Bovine colostrum is superior to enriched formulas in stimulating intestinal function and necrotising enterocolitis resistance in preterm pigs. *Br J Nutr* 2011;105(1):44-53. doi: 10.1017/S0007114510003168 [published Online First: 2010/08/21]
12. Sangild PT, Siggers RH, Schmidt M, et al. Diet- and colonization-dependent intestinal dysfunction predisposes to necrotizing enterocolitis in preterm pigs. *Gastroenterology* 2006;130(6):1776-92. doi: 10.1053/j.gastro.2006.02.026 [published Online First: 2006/05/16]
13. Bartel DP. MicroRNAs: target recognition and regulatory functions. *Cell* 2009;136(2):215-33. doi: 10.1016/j.cell.2009.01.002 [published Online First: 2009/01/27]
14. Brennecke J, Stark A, Russell RB, et al. Principles of microRNA-target recognition. *PLoS Biol* 2005;3(3):e85. doi: 10.1371/journal.pbio.0030085 [published Online First: 2005/02/22]
15. Chipman LB, Pasquinelli AE. miRNA Targeting: Growing beyond the Seed. *Trends Genet* 2019;35(3):215-22. doi: 10.1016/j.tig.2018.12.005 [published Online First: 2019/01/15]

16. Djuranovic S, Nahvi A, Green R. A parsimonious model for gene regulation by miRNAs. *Science* 2011;331(6017):550-3. doi: 10.1126/science.1191138 [published Online First: 2011/02/05]
17. Weber JA, Baxter DH, Zhang S, et al. The microRNA spectrum in 12 body fluids. *Clin Chem* 2010;56(11):1733-41. doi: 10.1373/clinchem.2010.147405 [published Online First: 2010/09/18]
18. Chen X, Gao C, Li H, et al. Identification and characterization of microRNAs in raw milk during different periods of lactation, commercial fluid, and powdered milk products. *Cell Res* 2010;20(10):1128-37. doi: 10.1038/cr.2010.80 [published Online First: 2010/06/16]
19. Melnik BC. Milk: an epigenetic amplifier of FTO-mediated transcription? Implications for Western diseases. *J Transl Med* 2015;13:385. doi: 10.1186/s12967-015-0746-z [published Online First: 2015/12/23]
20. Melnik BC. Milk disrupts p53 and DNMT1, the guardians of the genome: implications for acne vulgaris and prostate cancer. *Nutr Metab (Lond)* 2017;14:55. doi: 10.1186/s12986-017-0212-4 [published Online First: 2017/08/18]
21. Melnik BC, Schmitz G. Milk's Role as an Epigenetic Regulator in Health and Disease. *Diseases* 2017;5(1) doi: 10.3390/diseases5010012 [published Online First: 2017/09/22]
22. Title AC, Denzler R, Stoffel M. Uptake and Function Studies of Maternal Milk-derived MicroRNAs. *J Biol Chem* 2015;290(39):23680-91. doi: 10.1074/jbc.M115.676734 [published Online First: 2015/08/05]
23. Kahn S, Liao Y, Du X, et al. Exosomal MicroRNAs in Milk from Mothers Delivering Preterm Infants Survive in Vitro Digestion and Are Taken Up by Human Intestinal Cells. *Mol Nutr Food Res* 2018;62(11):e1701050. doi: 10.1002/mnfr.201701050 [published Online First: 2018/04/13]
24. Perge P, Nagy Z, Decmann A, et al. Potential relevance of microRNAs in inter-species epigenetic communication, and implications for disease pathogenesis. *RNA Biol* 2017;14(4):391-401. doi: 10.1080/15476286.2016.1251001 [published Online First: 2016/10/30]
25. Griffiths-Jones S, Grocock RJ, van Dongen S, et al. miRBase: microRNA sequences, targets and gene nomenclature. *Nucleic Acids Res* 2006;34(Database issue):D140-4. doi: 10.1093/nar/gkj112 [published Online First: 2005/12/31]
26. Chen Y, Wang X. miRDB: an online database for prediction of functional microRNA targets. *Nucleic Acids Res* 2020;48(D1):D127-D31. doi: 10.1093/nar/gkz757 [published Online First: 2019/09/11]
27. Zoppelli L, Guttel C, Bittrich HJ, et al. Fecal calprotectin concentrations in premature infants have a lower limit and show postnatal and gestational age dependence. *Neonatology* 2012;102(1):68-74. doi: 10.1159/000337841 [published Online First: 2012/05/23]
28. Snoeck V, Huyghebaert N, Cox E, et al. Gastrointestinal transit time of nondisintegrating radio-opaque pellets in suckling and recently weaned piglets. *J Control Release* 2004;94(1):143-53. doi: 10.1016/j.jconrel.2003.09.015 [published Online First: 2003/12/20]
29. Janas MM, Wang B, Harris AS, et al. Alternative RISC assembly: binding and repression of microRNA-mRNA duplexes by human Ago proteins. *RNA* 2012;18(11):2041-55. doi: 10.1261/rna.035675.112 [published Online First: 2012/09/29]

30. Melnik BC, Kakulas F, Geddes DT, et al. Milk miRNAs: simple nutrients or systemic functional regulators? *Nutr Metab (Lond)* 2016;13:42. doi: 10.1186/s12986-016-0101-2 [published Online First: 2016/06/23]
31. Nelson PT, De Planell-Saguer M, Lamprinaki S, et al. A novel monoclonal antibody against human Argonaute proteins reveals unexpected characteristics of miRNAs in human blood cells. *RNA* 2007;13(10):1787-92. doi: 10.1261/rna.646007 [published Online First: 2007/08/28]
32. Weil PP, Jaszczyszyn Y, Baroin-Tourancheau A, et al. Holistic and Affordable Analyses of MicroRNA Expression Profiles Using Tagged cDNA Libraries and a Multiplex Sequencing Strategy. *Methods Mol Biol* 2017;1654:179-96. doi: 10.1007/978-1-4939-7231-9\_12 [published Online First: 2017/10/08]
33. Blankenberg D, Von Kuster G, Coraor N, et al. Galaxy: a web-based genome analysis tool for experimentalists. *Curr Protoc Mol Biol* 2010;Chapter 19:Unit 19 10 1-21. doi: 10.1002/0471142727.mb1910s89 [published Online First: 2010/01/14]
34. Giardine B, Riemer C, Hardison RC, et al. Galaxy: a platform for interactive large-scale genome analysis. *Genome Res* 2005;15(10):1451-5. doi: 10.1101/gr.4086505 [published Online First: 2005/09/20]
35. Goecks J, Nekrutenko A, Taylor J, et al. Galaxy: a comprehensive approach for supporting accessible, reproducible, and transparent computational research in the life sciences. *Genome Biol* 2010;11(8):R86. doi: 10.1186/gb-2010-11-8-r86 [published Online First: 2010/08/27]
36. Vitsios DM, Enright AJ. Chimira: analysis of small RNA sequencing data and microRNA modifications. *Bioinformatics* 2015;31(20):3365-7. doi: 10.1093/bioinformatics/btv380 [published Online First: 2015/06/21]
37. Aparicio-Puerta E, Lebron R, Rueda A, et al. sRNAbench and sRNAtoolbox 2019: intuitive fast small RNA profiling and differential expression. *Nucleic Acids Res* 2019;47(W1):W530-W35. doi: 10.1093/nar/gkz415 [published Online First: 2019/05/23]
38. Blankenberg D, Gordon A, Von Kuster G, et al. Manipulation of FASTQ data with Galaxy. *Bioinformatics* 2010;26(14):1783-5. doi: 10.1093/bioinformatics/btq281 [published Online First: 2010/06/22]
39. Kim D, Pertea G, Trapnell C, et al. TopHat2: accurate alignment of transcriptomes in the presence of insertions, deletions and gene fusions. *Genome Biol* 2013;14(4):R36. doi: 10.1186/gb-2013-14-4-r36 [published Online First: 2013/04/27]
