## Uncovering the gastrointestinal passage, intestinal epithelial cellular uptake and AGO2 loading of milk miRNAs in neonates using xenomiRs as tracers

Patrick Philipp Weil<sup>1</sup>, Susanna Reincke<sup>1</sup>, Christian Alexander Hirsch<sup>1</sup>, Federica Giachero<sup>1</sup>, Malik Aydin<sup>1,2</sup>, Jonas Scholz<sup>3</sup>, Franziska Jönsson<sup>3</sup>, Claudia Hagedorn<sup>3</sup>, Duc Ninh Nguyen<sup>4</sup>, Thomas Thymann<sup>4</sup>, Anton Pembaur<sup>1</sup>, Valerie Orth<sup>5</sup>, Victoria Wünsche<sup>1</sup>, Ping-Ping Jiang<sup>4,6</sup>, Stefan Wirth<sup>2</sup>, Andreas C. W. Jenke<sup>7</sup>, Per Torp Sangild<sup>4</sup>, Florian Kreppel<sup>3</sup>, Jan Postberg<sup>1,\*</sup>

\*corresponding author

### Authors and e-mail addresses:

|                            |                                                                                          |
|----------------------------|------------------------------------------------------------------------------------------|
| Patrick Philipp Weil       | <a href="mailto:patrick.weil@uni-wh.de">patrick.weil@uni-wh.de</a>                       |
| Susanna Reincke            | <a href="mailto:susanna.reincke@uni-wh.de">susanna.reincke@uni-wh.de</a>                 |
| Christian Alexander Hirsch | <a href="mailto:christian.hirsch@uni-wh.de">christian.hirsch@uni-wh.de</a>               |
| Federica Giachero          | <a href="mailto:federica.giachero@uni-wh.de">federica.giachero@uni-wh.de</a>             |
| Malik Aydin                | <a href="mailto:malik.aydin@uni-wh.de">malik.aydin@uni-wh.de</a>                         |
| Jonas Scholz               | <a href="mailto:jonas.scholz@uni-wh.de">jonas.scholz@uni-wh.de</a>                       |
| Franziska Jönsson          | <a href="mailto:franziska.joensson@uni-wh.de">franziska.joensson@uni-wh.de</a>           |
| Claudia Hagedorn           | <a href="mailto:claudia.hagedorn@uni-wh.de">claudia.hagedorn@uni-wh.de</a>               |
| Duc Ninh Nguyen            | <a href="mailto:dnn@sund.ku.dk">dnn@sund.ku.dk</a>                                       |
| Thomas Thymann             | <a href="mailto:thomas.thymann@sund.ku.dk">thomas.thymann@sund.ku.dk</a>                 |
| Ping-Ping Jiang            | <a href="mailto:jiangpp3@mail.sysu.edu.cn">jiangpp3@mail.sysu.edu.cn</a>                 |
| Anton Pembaur              | <a href="mailto:anton.pembaur@uni-wh.de">anton.pembaur@uni-wh.de</a>                     |
| Valerie Orth               | <a href="mailto:valerie.orth@helios-gesundheit.de">valerie.orth@helios-gesundheit.de</a> |
| Victoria Wünsche           | <a href="mailto:victoria.wuensche@uni-wh.de">victoria.wuensche@uni-wh.de</a>             |
| Stefan Wirth               | <a href="mailto:stefan.wirth@helios-gesundheit.de">stefan.wirth@helios-gesundheit.de</a> |
| Andreas C. W. Jenke        | <a href="mailto:andreas.jenke@klinikum-kassel.de">andreas.jenke@klinikum-kassel.de</a>   |
| Per Torp Sangild           | <a href="mailto:pts@sund.ku.dk">pts@sund.ku.dk</a>                                       |
| Florian Kreppel            | <a href="mailto:florian.kreppel@uni-wh.de">florian.kreppel@uni-wh.de</a>                 |
| Jan Postberg               | <a href="mailto:jan.postberg@uni-wh.de">jan.postberg@uni-wh.de</a>                       |

<sup>1</sup>Clinical Molecular Genetics and Epigenetics, Faculty of Health, Centre for Biomedical Education & Research (ZBAF), Witten/Herdecke University, Alfred-Herrhausen-Str. 50, 58448 Witten, Germany

<sup>2</sup>HELIOS University Hospital Wuppertal, Children's Hospital, Centre for Clinical & Translational Research (CCTR), Witten/Herdecke University, Heusnerstr. 40, 42283 Wuppertal, Germany

© 2023. This manuscript version is made available under the [CC-BY-NC-ND 4.0](https://creativecommons.org/licenses/by-nc-nd/4.0/)

license <https://creativecommons.org/licenses/by-nc-nd/4.0/> and should not be used to guide clinical practice.

<sup>3</sup>Chair of Biochemistry and Molecular Medicine, Faculty of Health, Centre for Biomedical Education and Research (ZBAF), Witten/Herdecke University, Stockumer Str. 10, 58453 Witten, Germany

<sup>4</sup>Comparative Pediatrics and Nutrition, Department of Veterinary and Animal Sciences, University of Copenhagen, Copenhagen, Denmark

<sup>5</sup>HELIOS University Hospital Wuppertal, Department of Surgery II, Centre for Clinical & Translational Research (CCTR), Witten/Herdecke University, Heusnerstr. 40, 42283 Wuppertal, Germany

<sup>6</sup>School of Public Health, Sun Yat-sen University, Guangzhou, China

<sup>7</sup>Klinikum Kassel, Zentrum für Kinder- und Jugendmedizin, Neonatologie und allgemeine Pädiatrie, Mönchebergstr. 41-43, 34125 Kassel, Germany

### **Data availability statement**

The data described in the manuscript are made publicly and freely available without restriction at

<https://www.ncbi.nlm.nih.gov/bioproject/740153> (BioProject, accession no. PRJNA740153).

### **Accepted manuscript**

This manuscript underwent peer-review and was accepted for publication by the American Journal of Clinical Nutrition (Manuscript Number: AJCN-D-22-01322R2) on March 17<sup>th</sup> 2023.

### **Abbreviations**

Adenovirus-type 5 (Ad5); gastrointestinal passage (GI passage); human intestinal epithelial cells (HIEC); necrotizing enterocolitis (NEC); post-transcriptional gene silencing (PTGS); RNA interference (RNAi); transcriptional gene silencing (TGS)

### **Short title**

Milk miRNA GI passage and uptake

### **Key words**

intestinal maturation; enteral feeding; necrotizing enterocolitis; preterm delivery; fetal human intestinal epithelial cells; preterm piglet; miRNA target

1 **Abstract**

2 **Background:** Human breast milk has a high microRNA (miRNA) content. It remains unknown  
3 whether and how milk miRNAs might affect intestinal gene regulation and homeostasis of the  
4 developing microbiome after initiation of enteral nutrition. However, this requires that relevant milk  
5 miRNA amounts survive gastrointestinal passage, are taken up by cells, and become available to the  
6 RNA interference (RNAi) machinery. It seems important to dissect the fate of these miRNAs after oral  
7 ingestion and gastrointestinal passage.

8 **Objective:** Our goal was to analyze the potential transmissibility of milk miRNAs via the  
9 gastrointestinal system in neonate humans and a porcine model *in vivo* to contribute to the discussion  
10 whether milk miRNAs could influence gene regulation in neonates and thus might vertically transmit  
11 developmental relevant signals.

12 **Design:** We performed cross-species profiling of miRNAs via deep-sequencing and utilized dietary  
13 xenobiotic taxon-specific milk miRNA (xenomiRs) as tracers in human and porcine neonates,  
14 followed by functional studies in primary human fetal intestinal epithelial cells (HIEC-6) using Ad5-  
15 mediated miRNA-gene transfer.

16 **Results:** Mammals share many milk miRNAs yet exhibit taxon-specific miRNA fingerprints. We  
17 traced bovine-specific miRNAs from formula-nutrition in human preterm stool and 9 days after onset  
18 of enteral feeding in intestinal cells of preterm piglets. Thereafter, several xenomiRs accumulated in  
19 the intestinal cells. Moreover, few hours after introducing enteral feeding in preterm piglets with  
20 supplemented reporter miRNAs (cel-miR-39-5p/-3p), we observed their enrichment in blood serum  
21 and in AGO2-immunocomplexes from intestinal biopsies.

22 **Conclusions:** Milk-derived miRNAs survived gastrointestinal passage in human and porcine neonates.  
23 Bovine-specific miRNAs accumulated in intestinal cells of preterm piglets after enteral feeding with  
24 bovine colostrum/formula. In piglets, colostrum supplementation with cel-miR-39-5p/-3p resulted in  
25 increased blood levels of cel-miR-39-3p and argonaute RISC catalytic component 2 (AGO2) loading  
26 in intestinal cells. This suggests the possibility of vertical transmission of miRNA signaling from milk  
27 through the neonatal digestive tract.

28

29 **Introduction**

30 Milk from other species has been a part of human nutrition since the Neolithic period, and has left  
31 traces in the genomes of many modern humans. European hunter-gatherers were unable to digest  
32 lactose after weaning, but this changed with the migration of Neolithic populations who practiced  
33 dairy farming and exhibited genetic adaptations associated with lactase (LCT) persistence after  
34 infancy. This led to the dominance of lactase persistence markers in people of Caucasian descent  
35 today. (1, 2). Similar genetic adaptations have been observed in African and Middle Eastern  
36 populations. (3-5). Apparently, domestication of mammals was associated with the positive-selection  
37 of genetic traits allowing a beneficial niche construction, whereby adult carriers could exploit  
38 xenobiotic milk as additional food source (6-10). Notably, nowadays bovine milk in particular plays a  
39 global role on the world market as fresh milk or in processed products far beyond industrial baby milk  
40 products (11).

41 Genetic markers aside, LCT persistence and non-persistence are phenomena of gene regulation (2). In  
42 preterm neonates, LCT activity increases after beginning enteral feeding, with formula-fed infants  
43 exhibiting lower activity levels than milk-fed infants (12). Beyond LCT, a neonate piglet model study  
44 found that formula feeding resulted in different intestinal gene regulation compared to colostrum  
45 feeding or total parental nutrition. This is significant because the type of feeding can impact the risk of  
46 necrotizing enterocolitis (NEC) in premature infants. Infants who receive bovine milk-based formula  
47 have a higher risk of NEC compared to those who are fed breast milk or colostrum (13-16). However,  
48 the underlying molecular mechanisms responsible for nutrition-dependent differences in gene  
49 regulation remain unclear. Differences in post-transcriptional gene regulation through RNA  
50 interference (RNAi) could hypothetically be due to differences in the miRNA profiles of human milk  
51 and formula, as many formulas contain bovine milk. This post-transcriptional gene silencing (PTGS)  
52 can influence gene regulatory networks (Supplemental Figure 1). In PTGS, microRNAs (miRNAs)  
53 interacting with Argonaute (Ago) protein family members target specific mRNAs via base-pairing of  
54 their 5'-seed (17-19). Perfect or near-perfect base-pairing promotes the decay or translational  
55 repression of targeted mRNAs (20). MiRNAs occur in cells and ubiquitously in body fluids, among  
56 which human breast milk seems to exhibit the highest total amount (21). Many processed milk-

57 products and formulas contain miRNAs (22). MiRNAs are known to facilitate communication  
58 between cells. In this regard, it is widely accepted that these miRNAs may be packaged into  
59 extracellular vesicles (EVs), such as exosomes. However, miRNAs can also occur in vesicle-free  
60 forms (23).

61 There is an ongoing debate in science and society about possible adverse effects of milk consumption  
62 with particular emphasis on bovine milk and in some instances focusing the controversy on its  
63 miRNAs content (24-26). This discussion lacks comparative and experimental data on the biological  
64 significance of milk miRNAs. Contradictory results concerning the transmissibility of milk miRNAs  
65 have been published by different groups recently, who did not see evidence for milk miRNA uptake in  
66 newborn mice (27) or, respectively, demonstrated miRNA internalization in human intestinal cells *in*  
67 *vitro* after simulating infant gut digestion of milk (28). Interestingly, oral administration of cow milk  
68 exosomes in mice resulted in their apparent bioavailability, albeit low compared to intravenous  
69 administration (29). There remains thus an urgent need for further rigorous experimental data to  
70 inspire the debate and address the open problems: Are milk miRNAs functional, or are they a  
71 nucleo(t/s)ide source, only? Although several studies addressed this problem recently (30-32), we  
72 currently neither know well whether milk miRNAs build a path of vertical signal transmission from  
73 mother to the new-born nor whether interferences of xenomiRs with human target mRNAs can  
74 influence developmental pathways (33).

75 In this study, we aim to examine the transmissibility of milk miRNAs through the digestive system in  
76 neonates and a porcine model, to shed light on their potential impact on gene regulation and vertical  
77 transmission of developmental signals.

78

## 79 **Methods**

### 80 Clinical trial registration

81 All analyses including those using human fecal specimens were considered exploratory. Clinical trial  
82 registration was not required since participants were not prospectively assigned to an intervention, the  
83 research was not designed to evaluate the effect of an intervention on the participants, and no effect  
84 was being evaluated in an health-related biomedical or behavioral outcome.

85

86 Samples and animal procedures

87 Human milk (<6-72 hrs post partum) and stool specimens were collected with approval of the  
88 Witten/Herdecke University Ethics board (No. 41/2018) after informed written consent was obtained  
89 by all involved donors. Animal milk was purchased or collected with the help of Wuppertal Zoo, local  
90 farmers, or veterinary medics. A participant flowchart for human and animal milk specimen collection  
91 is provided (Supplemental Figure 2). All animal procedures were approved by the National Council on  
92 Animal Experimentation in Denmark (protocol number 2012-15-293400193). Piglet (landrace × large  
93 white × duroc; delivered by caesarean section on day 105 [90%] of gestation) blood and gut biopsies  
94 derived from an ongoing experimental series described previously (34). A participant flowchart for  
95 piglet intestinal specimen collection is provided (Supplemental Figure 3). Reported milk nucleic acids  
96 concentration were used as guideline for reporter miRNA supplementation of bovine colostrum bolus,  
97 which was intended for piglet feeding (23 mg/L ± 19 mg/L [8.6-71 mg/L]) (35). We supplemented  
98 bovine colostrum bolus with RNA oligonucleotides mimicking both putatively processed strands of  
99 *Caenorhabditis elegans* (cel), cel-miR-39-5p and cel-miR-39-3p, and adjusted their amount to achieve  
100 approx. 5-10% of human milk's total nucleic acids content. Before the feeding experiments, we  
101 checked whether the spiked cel-miRNAs became enriched within the EV fraction of human, bovine  
102 and porcine colostrum as described below. Three neonatal low-birth-weight piglets from the same  
103 litter (mean birth weight 1,119 g [1,071-1,167 g]; normal birth weight approx. 1,400-1,500 g) received  
104 initial feeding ( $t_0$ ) of bovine colostrum bolus (15 mL/kg) enriched with 39 g/L casein  
105 glycomacropeptide (CGMP), 2.8 g/L osteopontin (OPN) and a mix of cel-miR-39-5p/-3p reporter  
106 miRNAs. As control, three other piglets from the same litter received colostrum bolus without reporter  
107 miRNA supplementation (mean birth weight 1,047 g [862-1,240 g]). After 2.5 h, the piglets received  
108 another bolus to facilitate gut motility. At different time points post-feeding ( $t_1=30$  min,  $t_2=1$  h,  $t_3=2$  h,  
109  $t_4=3$  h,  $t_5=5$  h and  $t_6=7$  h) 1 mL peripheral blood was sampled. Total RNA was used for miRNA  
110 library preparation and successive analyses of enrichment of both reporter cel-miRNAs by qPCR,  
111 whereas confirmatory miRNA-seq was conducted 7 h post-feeding only.

112 Enrichment of piglet intestinal epithelial cells from intestinal mucosa biopsies was done as follows.  
113 Pigs were euthanized using 200 mg/kg intraarterial sodium pentobarbital after anesthesia  
114 administration. The GI tract was immediately removed, and the small intestine was carefully emptied  
115 of its contents. 30 cm of the distal small intestine were used for cell collection. The segment was  
116 flushed with 10 mL of pre-chilled NaCl 0.9% (Fresenius Kabi, Uppsala, Sweden) and then cut open  
117 along the length. The upper layer of the intestinal mucosa was gently scraped off with a microscopic  
118 slide and transferred in a 15 mL tube containing 12.5 mL PBS containing FBS (final concentration  
119 1.12  $\mu$ L/mL). Homogenization was achieved by pipetting with a plastic Pasteur pipette for about 1 min  
120 and then stirring the solution at 500 rpm for 20 min at room temperature. The homogenized  
121 suspension was filtered through a 70  $\mu$ m cell sieve and spun down at 500x g at 4°C for 3 min. The cell  
122 pellet was resuspended in 5 mL modified PBS (see above), filtered and centrifuged again. The pellet  
123 was then resuspended in 1 mL red blood cell lysis buffer (1x, Invitrogen™, ThermoFisher  
124 Scientific), incubated for 5 min at room temperature and then spun down at 500x g at 4°C for 3 min.  
125 The cell pellet was washed again and finally resuspended in 1 mL modified PBS (see above). From  
126 the resulting single cell suspension 250  $\mu$ L were used for RNA purification. The authors state that they  
127 have obtained appropriate institutional review board approval or have followed the principles outlined  
128 in the Declaration of Helsinki for all human or animal experimental investigations.

129

### 130 Milk extracellular vesicle (EV) fractionation and detection of supplemented cel-miR

131 Human, bovine and porcine sera obtained by 2x 10 min centrifugation at 3,000x g were spiked with  
132 various concentrations of cel-mir-39-5p/3p (final concentrations: 5  $\mu$ M, 1  $\mu$ M, 0.2  $\mu$ M or 40 nM)  
133 followed by overnight incubation at 4°C prior to EV enrichment as described elsewhere (36). Briefly,  
134 ExoQuick exosome precipitation reagent (SBI System Biosciences) was added upon manufacturer's  
135 recommendation followed by another overnight incubation at 4°C. EVs and supernatant were  
136 separated at 13,000x g for 30 minutes at 4°C. Then RNA was purified as described below. RNA was  
137 analyzed on an Agilent Bioanalyzer 2100 and by polyacrylamide gel electrophoresis (PAGE).  
138 Endogenous controls (miR-148a-3p, miR-143-3p, miR-99b-5p, and U6 snRNA) and spiked cel-miR-

139 39-5p/3p were assessed using the Mir-X™ miRNA First Strand Synthesis Kit (Takara) in combination  
140 with qPCR and primers as listed (Supplemental Table 1A).

141

#### 142 Nucleic acids

143 Total RNA was purified from milk serum, blood serum, radically grinded tissue, cells and stool  
144 samples using Trizol reagent (Sigma, MO, USA) upon manufacturer's recommendations followed by  
145 isopropanol precipitation and dilution in water. RNA quality and quantity were assessed by  
146 microcapillary electrophoresis using an Agilent Bioanalyzer 2100 similarly as described (37). A list of  
147 oligonucleotides used is provided as appendix (Supplemental Table 1A).

148

#### 149 Selection of cattle-specific reporter miRNAs

150 For deeper investigation of their putative influence in a human host we selected several bta-miRs  
151 using relative quantities and the validated the absence of similar miRNAs in the human miRNome as  
152 the main selection criteria. Selected bta-miRNA quantities were estimated via their ranks (#n) within  
153 *Bos taurus* total miRNAs: bta-mir-2904 (#19); bta-mir-2887 (#67); bta-mir-2478 (#93); bta-mir-3533  
154 (#141); bta-mir-2428 (#169); bta-mir-2440 (#172); bta-mir-677 (#191); bta-mir-2892 (#229); bta-mir-  
155 2404 (#232); bta-mir-2361 (#237); bta-mir-2372 (#278); bta-mir-2304 (#284). Typically, human  
156 mRNA target prediction for those bta-miRNAs via miRDB (38) revealed dozens of potential high  
157 scoring 3'-UTR targets, with transcripts of several master regulatory genes among them  
158 (Supplemental Table 2). For example, for bta-miR-677-5p (5'-  
159 CUCACUGAUGAGCAGCUUCUGAC-3', probable seed-sequence underlined), transcription factor  
160 SP4, *zink finger and homeobox family member 1* (ZHX1) and the chromatin remodeler ATRX were  
161 among the predicted human mRNA targets (n=655). Importantly, such algorithms usually deliver large  
162 numbers of false-positive results, which might be invalid for specific cell types-of-interest. But before  
163 interrogating this problem, it is crucial to address whether (xenobiotic) miRNAs stay intact during the  
164 gastric and intestinal transit and eventually do reach potential mRNA targets within cells.

165

#### 166 Real time PCR



167 Quantitative measurement of miRNAs was analyzed from cDNA libraries (as described in (37)) using  
168 primer pairs as listed (Supplemental Table 1A) and the QuantiTect SYBR Green PCR Kit (Qiagen)  
169 using a Corbett Rotor-Gene 6000 qPCR machine. Specifically, a combination of miR-specific forward  
170 primers [bta/pan-miR-*name*-5p/-3p-fw] and library-specific reverse primers [library\_P*n*\_miR\_rv]) was  
171 used (Supplemental Table 1B). PCR conditions were as follows: 95°C for 15 min, 40 cycles of (95°C  
172 for 15 s, 60°C for 30 s). Amplicon melting was performed using a temperature gradient from 55–95°C,  
173 rising in 0.5°C increments. For relative comparative quantification of quantitative expression fold  
174 changes we utilized the  $\Delta\Delta C_t$  method (39) using stable miR-143-3p, miR-99b-5p and let7b-5p for  
175 normalization.

176

#### 177 Deep sequencing of miRNAs (miRNA-seq) and bioinformatics pipeline

178 Small RNAs (18-36 nt) were purified from total RNA using polyacrylamide gel electrophoresis  
179 (PAGE). The subsequent cDNA library preparation utilizes a four-step process starting with the  
180 ligation of a DNA oligonucleotide to the 3'-end of the selected small RNAs, followed by ligation of a  
181 RNA oligonucleotide to the 5'-end of the selected small RNAs. The resulting molecules were  
182 transcribed via reverse transcription (RT) and amplified via PCR (37). Subsequently, after final quality  
183 checks by microcapillary electrophoresis and qPCR, the libraries were sequenced on an Illumina  
184 HiSeq 2000 platform (single end, 50 bp). This work has benefited from the facilities and expertise of  
185 the high throughput sequencing core facility of I2BC (Research Center of GIF –  
186 <http://www.i2bc.paris-saclay.fr/>). The initial data analysis pipeline was as follows: CASAVA-1.8.2  
187 was used for demultiplexing, Fastqc 0.10.1 for read quality assessment and Cutadapt-1.3 for adaptor  
188 trimming, resulting in sequencing reads and the corresponding base-call qualities as FASTQ files. File  
189 conversions, filtering and sorting as well as mapping, were done using 'Galaxy' (40-42), a platform  
190 for data intensive biomedical research (<https://usegalaxy.org/>), or 'Chimira' (43), sRNAtoolbox (44)  
191 or 'miRBase' (45), respectively. For selected bta-mir we used the miRDB custom option for sequence-  
192 based prediction of potential human mRNA targets (38). miRDB's main criterion to report a potential  
193 miRNA:mRNA interaction is based on perfect or near-perfect base pairing of the 5'-seed region of the

194 miRNA with the 3'-UTR of an mRNA. The presence of multiple potential targets in a 3'-UTR is  
195 incorporated into the ranking of potential targets.

196

#### 197 Argonaute co-immunoprecipitation (Co-IP)

198 Association of reporter cel-miR-39 co-fed with milk with Argonaute (AGO2) in piglet intestinal  
199 biopsies was analyzed using co-immunoprecipitation and qPCR. For native pan-AGO2 precipitation  
200 from intestinal tissue we used monoclonal mouse anti-pan-AGO2 antibodies (Sigma-Aldrich,  
201 MABE56, clone 2A8) similarly as described previously (46). This antibody exhibits cross-species  
202 reactivity with AGO2 from mouse, humans, and most probably from other mammals as well. After  
203 final blood sampling 7-7.5 h post-feeding proximal and distal tissues were taken at euthanasia, deep  
204 frozen at -20°C and shipped on dry ice. Prior to immunoprecipitation piglet intestinal tissue from a  
205 liquid nitrogen storage tank was powdered using a Cellcrusher™ (Cellcrusher, Co. Cork, Ireland) pre-  
206 chilled in liquid nitrogen. Subsequently, intestinal tissue powder was suspended in lysis buffer (20  
207 mM Tris-HCl, pH7.5, 200 mM NaCl, 2.5 mM MgCl<sub>2</sub>, 0.5% Triton X-100). Samples were incubated  
208 overnight with 3 µg anti-pan-Ago (2A8) and 25 µL magnetic protein A beads (Diagenode). Following  
209 the enrichment of immunocomplexes on a magnetic rack and several washes with PBS, the samples  
210 were heated to 95°C for 15 min, and then RNA was purified from the immunocomplexes using Trizol  
211 and isopropanol precipitation. Then RNA converted into cDNA libraries and cel-miR-39-5p/-3p were  
212 analyzed from cDNA libraries by qPCR.

213

#### 214 Luciferase assay

215 We performed this experiment to rule out exemplarily that the observed bta-miR-candidates could be  
216 simply miRNA-like sequence artefacts without any function, we interrogated whether bta-miR-677, a  
217 candidate miRNA with intermediate abundance in milk can silence luciferase expression *in vitro* via a  
218 predicted 3'-UTR target sequence in a human HeLa cell-based assay. Therefore, a Sac1/Nhe1  
219 fragment with sticky ends was hybridized from oligonucleotides through incubation in a boiling water  
220 bath and successive chilling to room temperature (Supplemental Table 1B). Then we cloned the  
221 fragment containing a 7 bp 3'-UTR target motif reverse complementary to the 5'-seed (nucleotides 2-

222 8) of bta-miR-677-5p into the 3'-UTR region of the firefly luciferase gene (*luc2*) encoded in the  
223 pmirGLO dual luciferase expression vector (Promega) (Supplemental Figure 4A). For  
224 bioluminescence calibration this vector contained a 2<sup>nd</sup> luciferase cassette (*Renilla*; hRluc-neo fusion).  
225 Subsequently, pmirGLO was co-transfected into HeLa cells using Lipofectamin 2000 (ThermoFisher)  
226 with bta-mir-677-like hairpin RNAs or non-luciferase directed controls, followed by bioluminescence  
227 quantification using a GloMax® Multi Detection System (Promega). We observed very robust  
228 silencing of firefly luciferase upon bta-mir-677-like co-transfection, suggesting that at least bta-miR-  
229 677-5p can function as valid miRNA in human cells (Supplemental Figure 4B).

230

### 231 Insertion of microRNA-hairpins into Ad5 vectors

232 To assess the effects of miRNA overexpression in cell culture Ad5-based replication deficient  $\Delta E1$   
233 vectors harboring an hCMV promoter-driven expression cassette for the concomitant expression of  
234 EGFP (as transduction marker) and miRNAs were generated based on the 'BLOCK-iT Pol II miR  
235 RNAi Expression Vector Kits' protocol (Invitrogen). Vectors were serially amplified on 293 cells and  
236 purified by CsCl density centrifugation. The vector titers were determined by OD260 and vector  
237 genome integrity was confirmed by sequencing and restriction digest analysis (47). Hairpins  
238 mimicking bovine pre-mirs were designed to express miRNAs, which corresponded to bta-miR-677-  
239 5p, bta-miR-2440-3p, bta-miR-2361-5p. Details of vector design can be obtained upon request. The  
240 expression of bta-mir-677-like hairpins, bta-miR-677-5p and bta miR-677-3p, respectively, was  
241 evaluated by qPCR using the Mir-X™ miRNA First Strand Synthesis Kit (Takara).

242

### 243 Cell culture and Ad5 transduction

244 Human intestinal epithelial cells (HIEC-6 [ATCC CRL-3266]) cells were cultured upon  
245 manufacturer's recommendations. Flow cytometric analyses of HIEC-6 cells transduced with different  
246 ranges of multiplicity of infection (MOI) were used to define a transduction efficiency and to  
247 determine the optimal MOI (Supplemental Figure 5). Considering transduction efficiency and  
248 compatibility, we subsequently used MOI 10,000 in experimental routine. One day pre-transduction,  
249 10<sup>6</sup> HIEC-6 cells were seeded in 6-well cell culture dishes. The following day, cells were washed with

250 PBS, provided with fresh medium and subsequently transduced with respective Ad5 vector particles.  
251 Cells were harvested 96 h post-transduction. The expression of bta-mir-677-like hairpins, bta-miR-  
252 677-5p and bta-miR-677-3p, respectively, was validated using the Mir-X™ miRNA First Strand  
253 Synthesis Kit (Takara) in combination with qPCR. The results confirmed the expression of bta-mir-  
254 677-like hairpins, bta-miR-677-5p, but a bias for bta-miR-677-3p suggesting preferential processing of  
255 the 5-p guide strand (Supplemental Figure 6). For Western blot analyses cell pellets were  
256 homogenized in RIPA buffer (50 mM Tris HCl pH 8.0, 150 mM NaCl, 1% NP-40, 0,5% sodium  
257 deoxycholate, 0,1% SDS plus cOmplete™ Mini Protease Inhibitor Cocktail [Sigma-Aldrich]).  
258 Alternatively, cells were grown on coverslips for immunofluorescence microscopy. Here, after Ad5-  
259 mediated miRNA transfer successful expression of the miRNA transgene could be indirectly  
260 confirmed using immunofluorescence microscopy and flow cytometry for detection of green  
261 fluorescent protein (GFP) that was co-expressed with bta-mir-677-like hairpins from the same  
262 transcript.

263

#### 264 Western blot analyses

265 Homogenized pellets were mixed with SDS. Proteins were separated by SDS-PAGE using 5%  
266 stocking and 8% running gels and subsequently transferred to a nitrocellulose blotting membrane  
267 (Amersham Protran Premium 0.45 µm NC). Membranes were blocked 1% BSA in TBST (20 mM  
268 Tris;150 mM NaCl; 0.1% Tween 20; pH 7.4). Polyclonal rabbit anti-ATRX (Abcam; ab97508),  
269 polyclonal rabbit anti-DDX3 (Abcam; ab235940), polyclonal rabbit anti-ZHX1 (Abcam; ab19356),  
270 polyclonal rabbit anti-PLCXD3 (Sigma-Aldrich; HPA046849), polyclonal rabbit anti-GAPDH  
271 (Sigma-Aldrich; G8795) were used as primary antibodies at 1:500 dilution in blocking buffer, except  
272 anti-GAPDH (dilution 1:20,000 in blocking buffer). For internal normalization anti-GAPDH was used  
273 in parallel and simultaneously with each other primary antibody. Secondary antibodies were goat anti-  
274 rabbit IRDye 800CW (LI-COR; 926-32211) and goat anti-mouse IRDye 680RD (LI-COR; 926-  
275 68070), each being diluted 1:10,000 as a mix in blocking buffer. Fluorescence was monitored using  
276 the Odyssey CLx Imaging system (LI-COR) with the 2-color detection option and analyzed using  
277 Image Studio software (LI-COR).

278

279 Immunofluorescence microscopy

280 5x 10<sup>5</sup> HIEC-6 cells were grown on coverslips in 6-well plates and transduced as described above.  
281 96 h post-transduction cells were fixed for 10 min in 2% PFA/DPBS, washed twice with DPBS and  
282 then permeabilized using 0.5% Triton X-100/DPBS, followed by 0.1N HCl for exactly 5 min for  
283 antigen retrieval and successive washes with DPBS. Blocking was done in 3% BSA/0.1% Triton  
284 X100/DPBS. Subsequently, the primary antibodies were incubated in blocking buffer for 1 h/37°C: 1.  
285 polyclonal rabbit anti-ATRX (Abcam; ab97508) at 1:100, polyclonal rabbit anti-DDX3 (Abcam;  
286 ab235940) at 1:500, polyclonal mouse anti-ZHX1 (Abcam; ab168522) at 1:100. Then polyclonal goat  
287 anti-rabbit Cy3 (Jackson ImmunoResearch) or polyclonal goat anti-mouse Cy3 (Jackson  
288 ImmunoResearch) were used as secondary antibodies, each at 1:100. Eventually, 4',6-diamidino-2-  
289 phenylindole (DAPI) was used for DNA counterstaining at 0.1 µg/mL followed by washes and  
290 mounting with Prolong Gold (Invitrogen). Acquisition of images was done with a Nikon Eclipse Ti  
291 Series microscope. Fluorochrome image series were acquired sequentially generating 8-bit grayscale  
292 images. The 8-bit grayscale single channel images were overlaid to an RGB image assigning a false  
293 color to each channel using open source software ImageJ (NIH Image, U.S. National Institutes of  
294 Health, Bethesda, Maryland, USA, <https://imagej.nih.gov/ij/>).

295

296 Deep sequencing of messenger RNAs (mRNA-seq) and bioinformatics pipeline

297 Total RNA was purified from Ad5-transduced HIEC-6 cells expressing a nonsense-miR or bta-miRs  
298 using Trizol reagent (Sigma, MO, USA) upon manufacturer's recommendations. RNA quality and  
299 quantity were assessed by microcapillary electrophoresis using an Agilent Bioanalyzer 2100. All  
300 specimens had a RIN between 8.9 and 9.2 and were subsequently used for sequencing library  
301 preparation. Enrichment of mRNAs was done using the NEBNext Poly(A) mRNA Magnetic Isolation  
302 Module (New England BioLabs, #E7490S) upon manufacturers' recommendations. Subsequently  
303 cDNA libraries were prepared using the NEBNext Ultra II DNA Library Prep Kit for Illumina (New  
304 England BioLabs, #E7645S) upon manufacturers' recommendations in combination with NEBNext  
305 Multiplex Oligos for Illumina (Index Primer Set 1) (New England BioLabs, #E7335G). Before

306 multiplexing, library quality and quantity were assessed by microcapillary electrophoresis using an  
307 Agilent Bioanalyzer 2100. Deep sequencing was done using an Illumina HiSeq2500. The initial data  
308 analysis pipeline was as follows: CASAVA-1.8.2 was used for demultiplexing, Fastqc 0.10.1 for read  
309 quality assessment and Cutadapt-1.3 for adaptor trimming, resulting in sequencing reads and the  
310 corresponding base-call qualities as FASTQ files. File conversions, filtering and sorting as well as  
311 mapping, were done using 'Galaxy' (40-42) (<https://usegalaxy.org/>), serially shepherding the FASTQ  
312 files through the following pipeline of tools: 1. FASTQ groomer (Input: Sanger & Illumina 1.8+  
313 FASTQ quality score type) (48); 2. TopHat for gapped-read mapping of RNA-seq data using the short  
314 read aligner Bowtie2 (Options: single end, *Homo sapiens*: hg38) resulting in a BAM formatted  
315 accepted hits file (49). 3. featureCounts to create tabular text file (Output format: Gene-ID "\t" read-  
316 count [MultiQC/DESeq2/edgeR/limma-voom compatible]). 4. Prior to DESeq2 normalization, a  
317 tabular file containing catalogued columns of read counts for all experiments was arranged in  
318 Microsoft Excel for Mac 16.32. and then uploaded as a tabular text file to Galaxy. 5. annotadeMyIDs  
319 was used to assign gene symbols and gene names to Entrez IDs.

320

### 321 Biostatistical tests

322 Biostatistical tests were carried out using GraphPad Prism 8.4.3 software. By multiple comparisons we  
323 studied the differential occurrence of detected milk miRNAs between hominidae vs. bovidae,  
324 hominidae vs. suinae, bovidae vs. suinae as well as omnivores vs. herbivores, omnivores vs.  
325 carnivores, or herbivores vs. carnivores using DESeq2-normalized miRNA data. Normal distribution  
326 tests were conducted for each miRNA assuming  $\alpha=0.05$  (accepted significance level) and using  
327 Shapiro-Wilk test or, alternatively, Kolmogorov-Smirnov test with the result that the majority of all  
328 miRNAs were normally distributed across all groups. For group-wise comparisons and to identify  
329 differentially distributed miRNAs, we conducted 2-way ANOVA test. Significance level accepted was  
330  $\alpha=0.05$ . Tukey's multiple comparisons test was selected as a method to correct for multiple  
331 comparisons and to report multiplicity adjusted P value for each comparison.

332 Differential effects of selected Ad5-mediated bta-miR expression were studied in HIEC-6 in  
333 comparison to HIEC-6 expressing a Ad5-mediated nonsense-miR (control group). Relative fold-

334 changes were compared between the whole HIEC-6 transcriptome (mRNA) and the lists of expressed  
335 predicted targets. Statistical power calculations were done using the nonparametric Wilcoxon–Mann–  
336 Whitney method.

337

### 338 Statement on methodological limitations

339 We identified some methodological limitations that should be considered when evaluating our results:

340 An important limitation concerns the interpretation of the spike experiments, especially the results of  
341 fractionation EVs. We used the ExoQuick precipitation method to gain initial insight into whether a  
342 miRNA added to colostrum is associated with the EV fraction in a mechanistically unknown manner.

343 This method is classified as a 'high recovery, low specificity' method according to the 'Minimal  
344 information for studies of extracellular vesicles 2018' (50), which does not allow high purity  
345 separation of the different subtypes of EVs. Importantly, future functional studies on the role of milk  
346 miRNAs in vertical transmission of maternal miRNA signals should therefore have higher quality  
347 requirements regarding EV purification and controls, following MISEV2018 guidelines.

348 The study used a small sample (only three piglets per group), which may not be sufficient to represent  
349 the entire population. The use of animal studies may also limit the generalizability of the results to  
350 humans. The amount of RNA oligonucleotides used for supplementation was based on a single study  
351 and may not reflect the typical content of nucleic acids in human or animal milk. The sequencing  
352 method used, and the bioinformatics pipeline may also introduce bias or error in data analysis.

353 Confirmatory miRNA sequencing was performed only 7 hours after feeding, which limits the ability to  
354 assess the overall time course of reporter miRNAs in piglets. The process of enrichment of piglet  
355 intestinal epithelial cells may lead to bias or loss of important information during the cell collection  
356 and purification steps. These limitations highlight the need for caution in interpreting the results and  
357 suggest that further studies with larger sample sizes and more comprehensive sampling and  
358 sequencing methods are needed to confirm the results.

359

## 360 **Results**

361 *Mammalian milks shared many miRNAs yet exhibited species-specific miRNA fingerprints*



362 We used miRNA deep sequencing (miRNA-seq) to determine miRNA profiles of human (hsa), cattle  
363 (bta), goat (cae), and sheep (ogm) milks. In addition, we speculated that an evolutionary context of  
364 milk miRNA profile differences might exist, for example between omnivores, herbivores, and  
365 carnivores. Therefore, our study also included milk from pig (ssc), okapi (ojo), horse (eca), donkey  
366 (eas), cat (fca), and dog (clu) (Figure 1A).

367 We detected 1291 hairpin-like pre-miRNAs (pre-mir) across all taxa. 139 of these pre-mirs occurred in  
368 all taxa. Notably, during the biogenesis of mature single-stranded miRNAs (miR), each single pre-mir  
369 can theoretically give rise to two mature miRs through processing of its guide (5p) and/or passenger  
370 (3p) strand. We visualized the top 100 milk miRNAs from 21 specimens as a heat map (Figure 1B)  
371 and as a dot plot (Supplemental Figure 7). In all specimens these top 100 miRNAs represented more  
372 than 90% of the total mapped miR read counts (range 92.40-96.39%).

373 The heat map and dot plot suggested a stable quantitative distribution of many miRNAs in the milk of  
374 most species, although principal component analysis revealed somewhat separate clusters in detail  
375 (Figure 1C): Cluster 'blue' contained all human specimens, cluster 'green' contained all herbivores as  
376 well as the dog, while the pig and cat appeared somewhat separated. For deeper investigation of the  
377 putative pairwise differences between individual hsa-miRs and bovid miRs, we used ANOVA tests  
378 (Supplemental Table 3). However, we only identified a few differences, with only miR-192-5p falling  
379 below  $p \leq 0.0001$  and 3 miRs falling between  $0.001 \leq p \leq 0.05$  (miR-1246, miR-146b-5p, miR-4516). We  
380 also observed few differences, when comparing hsa-miRs vs. ssc-miRs, bovid miRs vs. ssc-miRs,  
381 omnivores miRs vs. herbivores miRs, omnivores miRs vs. carnivores miRs and herbivores miRs vs.  
382 carnivores miRs (Supplemental Table 1).

383 Apart from the many miRNAs shared between all species, we observed numerous miRNAs being  
384 apparently shared by some taxa only or being taxon-specific. We undertook a systematic search to  
385 identify taxon-specific pre-mir and to analyze their non-overlapping or partial overlapping in different  
386 taxa using mapped miRNAs for Blast searches and the curated database miRbase as a source (45)  
387 (Supplemental Table 4). For each taxon, we identified several hundreds of milk pre-mirs (carnivores:  
388  $n=240$ ; bovids:  $n=521$ ; human:  $n=679$ ; pigs:  $n=272$ ; equids:  $n=381$ ), but only a fraction was shared  
389 between all or some taxa (Figure 1D). For example, 225 pre-mir were shared between humans and



390 cattle. Importantly, 440 pre-mir were human-specific and 270 were bovids-specific. We found many  
391 more pre-mir being specific for other taxa (pigs [n=91], equids [n=172] and carnivores [n=240]). Next,  
392 we exploited taxon-specific dietary xenomiRs from foreign species' milks as molecular tracers to  
393 study their gastrointestinal (GI) passage as well as systemic and cellular uptake in human or animal  
394 models.

395

396 *Dietary-derived bta-miRs survived the gastrointestinal transit in human newborns*

397 The heat map in Figure 1E illustrates the 50 top-ranked bovid-specific pre-mirs (specimens: 8 cattle, 1  
398 yak, 1 water buffalo) (Figure 1E; left column). Further, 11 formula/powdered milk products are shown  
399 (Figure 1E; right column) (compare Supplemental Table 1A). Most bovid-specific pre-mir from liquid  
400 milk were present in formula products with similar relative quantities, but mostly with lower total  
401 miRNA concentrations (Figure 1F). To study the GI passage of milk miRNAs taken in through the  
402 diet, we selected *Bos taurus* (bta)-specific (pre-) miRNAs as tracers. We defined their relative  
403 quantities and their validated absence in the human miRNome as main selection criteria (Figure 1E,  
404 red font). Subsequently, we examined a randomly selected preterm neonate stool sample collection  
405 from a neonatology intensive care unit. The donors were given routinely formula supplementation  
406 (mean gestational age: 29.2 weeks [24.4-35.7]) (51). Quantitative real-time PCR (qPCR) analyses  
407 were performed using cDNA libraries prepared from purified small RNAs and specific sets of bta-miR  
408 or pan-miR primer pairs (Supplemental Table 1B). As a matter of fact, we detected all interrogated  
409 bta-miRs intact in all pre-term stool samples (Figure 2A).

410

411 *In preterm piglets cattle-specific miRNAs became enriched in intestinal cells after 9-days of enteral*  
412 *nutrition with bovine colostrum or formula supplementation*

413 For deeper insights we used a preterm neonate piglet model to study the intestinal cellular uptake of  
414 milk miRNAs after prolonged feeding in vivo. This preterm neonate piglet model is being  
415 comprehensively used to study the effects of enteral feeding introduction post-delivery (13-16, 34).  
416 Therefore, we used cattle-specific colostrum- or formula-derived bta-miRs as tracers. For this  
417 experiment we prepared miRNA libraries for deep-sequencing from enriched intestinal epithelial cells

418 9 days after introducing enteral feeding and subsequent continuous supplementation with bovine  
419 colostrum or formula. Strikingly, we found that 4 bta-miRs were enriched within the 50 top-ranked  
420 intestinal cellular miRNAs (Figure 2B). Thereby, bta-miR-2904 occupied rank #4 suggesting that a  
421 dietary miRNA could possibly reach biologically significant concentration levels if being taken up by  
422 cells. Apparently, the amount of cellular uptake was influenced by the bta-miR concentration in  
423 bovine milk (bta-miR-2904: #4 in intestinal cells (IC) vs. #1 (bta-specific miRs) in bovine milk (BM);  
424 bta-miR-2881: #31/not ranked in IC/BM; bta-miR-2892: #37/6 in IC/BM; bta-miR-2887: #39/2 in  
425 IC/BM; compare Figure 1E).

426 Notably, we also tested the presence of bta-miRs in cerebrospinal fluid samples from piglets receiving  
427 enteral feeding of bovine colostrum (52), but we did not detect any.

428

429 *Feeding with cel-miR-39-5p/-3p-supplemented colostrum bolus led to rapid bloodstream enrichment*  
430 *of this reporter miRNA*

431 Following the observation of xenomiRs enrichment in intestinal cells of neonate piglets after a  
432 prolonged feeding period of 9 days, we interrogated whether milk miRNAs could possibly accumulate  
433 more rapidly. Again, we utilized the preterm piglet model and tested whether and how fast  
434 bloodstream accumulation of xenomiRs as tracers after the initiation of enteral feeding and after GI  
435 transit takes place. Therefore, a dietary colostrum bolus was supplemented with reporter miRNAs  
436 from *Caenorhabditis elegans* (cel-miR-39-5p and cel-miR-39-3p [Figure 3C]). For those reporter  
437 miRNAs as well as for endogenous control miRNAs (miR-148a-3p, miR-143-3p, miR-99b-5p) and  
438 U6 snRNA, we analyzed their differential enrichment in fractionated EVs using ExoQuick exosome  
439 precipitation reagent (SBI System Biosciences) and qPCR assessment of purified small RNAs. As  
440 suggested by microvolume electrophoresis (Figure 3A top) and PAGE (Figure 3A bottom), the yield  
441 of small RNAs from the EV fraction was comparatively higher than from the milk serum supernatant  
442 from human, bovine, and porcine colostrum. In qPCR analyses, using the endogenous controls for all  
443 human, bovine, and porcine colostrum samples, miR-143-3p and U6 snRNA were detectable in both  
444 the EV fraction and the supernatant (Supplemental Figure 8A). In contrast, we observed miR-99b-5p  
445 only in the EV fraction because melting curve analysis for miR-99b-5p suggested (partial) nonspecific

446 amplification. In all cases, we also observed that CT values for EV-associated amplicons were  
447 significantly smaller than for amplicon from the supernatant. We then tested whether the spiked cel-  
448 miRs were associated with EVs. To do this, we analyzed the small RNAs recovered from the EV  
449 fraction by qPCR and compared the samples with the serial cel-miR-395p/-3p dilutions with non-  
450 template-control (NTC) samples that did not contain cel-miR-39-5p/3p (Figure 3B, Supplemental  
451 Figure 8B,C). For all human, bovine, and porcine colostrum samples, similar results showed that the  
452 endogenous controls (miR-99b-5p, miR-143-3p, miR-148a-3p, and U6 snRNA) were largely  
453 uniformly and specifically detectable. Both cel-miR-39-5p and also cel-miR-39-3p were specifically  
454 and evidently detectable depending on the serial dilution. The experiments thus allow us to conclude  
455 that the miRNA tracer introduced into the colostrum samples co-precipitated with the EV fraction in  
456 remarkable amounts.

457 At different time points post-feeding ( $t_0=0$  min,  $t_1=30$  min,  $t_2=1$  h,  $t_3=2$  h,  $t_4=3$  h,  $t_5=5$  h and  $t_6=7$  h)  
458 peripheral blood was sampled. Then total serum RNA was used for miRNA library preparation and  
459 successive analyses of enrichment of both reporter cel-miRNAs by qPCR. For confirmation, miRNA-  
460 seq was conducted from serum sampled 7 h post-feeding. Along most time points of sampling, we did  
461 not observe qPCR signals above threshold, but 7 h post feeding we obtained a positive qPCR signal  
462 for cel-miR-39-3p (Figure 3C). The positive qPCR signal for cel-miR-39-3p was verified by miRNA-  
463 seq (Figure 3D). At the same time point no qPCR signal above threshold was observable for cel-miR-  
464 39-5p.

465

#### 466 *Dietary supplemented cel-miR-39-5p and cel-miR-39-3p co-precipitated with AGO2*

467 The biological activity of miRNAs requires their loading into AGO2-containing protein complexes.  
468 Thus, we analyzed whether cel-miR-39-5p/-3p miRNAs can be pulled-down from piglet intestinal  
469 biopsies 7h post-feeding using anti-pan-AGO2 monoclonal antibodies (Sigma-Aldrich, MABE56,  
470 clone 2A8). Via qPCR, both cel-miR-39-5p as well as cel-miR-39-3p could be detected in AGO2-  
471 precipitates from pre-term piglets, which were fed with cel-miR-39-5p/-3p-supplemented colostrum as  
472 described above (Figure 3E).

473

474 *Weak evidence for DDX3 targeting through bta-mir-677 in HIEC-6 cells was superimposed by several*  
475 *probable false-positive predictions of miRNA-mRNA interactions*

476 Using adenovirus type 5 (Ad5)-based miRNA gene transfer, we studied exemplarily the potential  
477 influence of bta-mir-677 (and other bta-miRs, see below) on bioinformatically predicted human targets  
478 in primary fetal human intestinal epithelial cells (HIEC-6) (53). By utilizing this transduction method,  
479 we efficiently overcame the typically disadvantageous signal-to-noise ratios of standard transfection  
480 protocols (Supplemental Figure 5). Transcriptome profiling of untreated and Ad5-treated cells  
481 confirmed that this model well fulfilled important criteria for the purpose of miRNA experiments,  
482 because the Ad5-treatment apparently did not lead to significant changes in the HIEC-6 transcriptome  
483 profiles: Under primary cell culture conditions and under the influence of Ad5-mediated miRNA  
484 transfer HIEC-6 retained fetal epithelial cell characteristics, and important gene activities related to  
485 miRNA biogenesis and RNAi activity were observable (Figure 4A).

486 For bta-miR-677-5p, miRDB (38) output a list of 655 predicted human target mRNAs. From this list,  
487 we selected ATRX, DDX3, PLCXD3 and ZHX1 for analyses by immunofluorescence microscopy and  
488 quantitative Western blots (Figure 4B,C). These predicted targets had high miRDB scores, and they  
489 were annotated being potential master regulators of other gene activities. However, from this  
490 unavoidably arbitrarily selection, none of the candidates exhibited differences in the quantity or  
491 subcellular distribution using microscopy (Figure 4B). On the scale of whole cell populations, we  
492 conducted quantitative Western blot analyses. Interestingly, for DDX3, analyses of two Western blots  
493 revealed a 24.45% reduction (SD:  $\pm 1.68\%$ ) of DDX3 signals in bta-mir-677-treated vs. wild-type and  
494 a 37.90% (SD:  $\pm 1.90\%$ ) DDX3 signal reduction in bta-mir-treated vs. ctrl-mir-treated HIEC-6.

495 Notably, the effects were not visible by eye (Figure 4C).

496 Since the above methods of experimental target validation on the protein level relies on a relatively  
497 arbitrary selection of putative targets and laborious non-holistic validation, we additionally analyzed  
498 the influence of Ad5-mediated miRNA gene transfer using a transcriptomics (mRNA-seq) approach to  
499 study the potential influence of three different bovine miRNAs-of-interest (miRoI) (bta-miR-677-5p,  
500 bta-miR-2440-3p and bta-miR-2361). Through normalization (miRoI-treated vs. nonsense-miR-treated  
501 HIEC-6) we obtained fold-changes in gene expression for every transcribed mRNAs. We then

502 compared the fold-changes of all expressed predicted target mRNA with the entire transcriptome of  
503 nonsense-miR-treated HIEC-6 (Figure 4D). Whereas most genes' transcripts remained relatively  
504 unaffected by miRoI-treatment (fold change: approx. 1.0), we observed an enrichment of significantly  
505 downregulated genes (fold change: <1.0) within the group of the predicted miRoI targets (Median  
506 fold-changes all transcripts/predicted targets: bta-miR-677-5p: 0.9908/0.8147 [ $p < 0.0001$ ]; bta-miR-  
507 2440-3p: 1.0070/0.9728 [ $p = 0.0240$ ]; bta-miR-2361-5p: 1.0340/0.9361 [ $p < 0.0001$ ]). Notably, we did  
508 not see any correlation between the degree of observed downregulation and the individual  
509 position/score as a result of target predictions.

510

## 511 **Discussion**

512 One exceptional previous study in the field used an elegant approach looking at the intestinal uptake  
513 of milk miRNAs in mmu-mir-375-knockout and mmu-mir-200c/141-knockout mice offspring, which  
514 received milk from wild-type foster mothers. Here, no evidence for intestinal epithelial uptake of  
515 miRNA and/or its enrichment in blood, liver and spleen was seen (27). Contradicting results were  
516 obtained from a more recent study that simulated infant gut digestion *in vitro* and analyzed the uptake  
517 of human milk miRNAs by human intestinal epithelial crypt-like cells (HIEC) deriving from fetal  
518 intestines at mid-gestation. Here, milk miRNA profiles remained stable after digestion and evidence  
519 for the uptake of milk-derived exosomes in HIEC was reported (28).

520 We can provide more clarity in this regard, since the discovery of many taxon-specific miRNAs  
521 allowed the conclusion that dietary xenomiRs from foreign species' milks could be exploited as  
522 molecular tracers *in vivo* to verify their gastrointestinal (GI) passage as well as systemic and cellular  
523 uptake in human or animal models. In human newborns dietary-derived bta-miRs survived the  
524 gastrointestinal transit. This demonstrated that nutritional uptake of milk miRNAs leads to their  
525 intestinal enrichment and suggests their stable sequence integrity during gastrointestinal (GI) transit in  
526 human preterm neonates.

527 In preterm piglets our initial observation was that cattle-specific miRNAs became enriched in  
528 intestinal cells after prolonged (9-days) enteral feeding with bovine colostrum or formula  
529 supplementation. Thereby, bta-miR-2904 occupied a high rank among the most abundant miRNAs

530 within intestinal cells. This suggested that a dietary miRNA could in principle reach biologically  
531 significant levels if being taken up by cells. Remarkably, for many identical miRNAs present in both  
532 bovine milk and porcine intestinal cells, we could not distinguish where they originated, i.e., whether  
533 they came from food or were produced by intestinal cells or both. It is also notable that none of the  
534 interrogated bta-miRs was detected in cerebrospinal fluid samples from piglets receiving enteral  
535 feeding of bovine colostrum (52), suggesting their limited blood-to-cerebrospinal fluid permeability  
536 or, respectively, indicating that they did not reach detectable concentrations.

537 If breast milk miRNAs were to fulfill signaling functions within a hypothetical, discrete perinatal  
538 ‘window of opportunity’ that opens during the introduction of enteral feeding, a much more rapid  
539 accumulation of miRNAs would be required. We assume that meanwhile this window is open, the  
540 intestine develops as an environment-organism interface to coordinate microbiome homeostasis.

541 Therefore, we considered that intestinal immaturity in preterm neonates could provide a clinically  
542 significant niche for (xenobiotic) milk miRNA influence. To investigate this, we performed additional  
543 xenomiR-tracer feeding experiments in neonatal preterm piglets for a period of 7 h after the onset of  
544 enteral feeding. We spiked human, bovine or porcine colostrum with cel-miR-39-5p and cel-miR-39-  
545 3p, and this led to their effective equilibration with the EV fraction. We assumed that externally  
546 supplied miRNAs were linked to endogenous miRNAs found in extracellular vesicles (EVs), which  
547 are believed to be bioavailable and non-nutritional. However, we caution that our experiments are  
548 insufficient to draw definitive conclusions whether and how spiked miRNAs could become packaged  
549 inside EVs, including whether specific EV subtypes such as exosomes are involved (see above:  
550 Statement on methodological limitations). Feeding with cel-miR-39-5p/-3p-supplemented colostrum  
551 bolus led to bloodstream enrichment of cel-miR-39-3p. From our qPCR results, we concluded that a  
552 transit of considerable amounts of cel-miR-39-3p from the GI tract into the bloodstream took place,  
553 whereas cel-miR-39-5p was not detected within the observation period. The timing of reporter miRNA  
554 accumulation in serum roughly appeared to be in agreement with GI transit times of radiotracers in  
555 suckling piglets (21 days old; approx. 1.5-3.5 h until 75% of gastric emptying and >9.5 h until 75%  
556 intestinal emptying) [28].

557 Importantly, we observed AGO2-loading with both cel-miR-39-5p and cel-miR-39-3p in intestinal  
558 cells. This suggested that AGO2 in intestinal cells was loaded with both the guide and the passenger  
559 strands, which resulted from processed cel-mir-39 (Figure 3E) and that AGO2-loaded milk miRNAs  
560 could indeed act as regulators in the development of gut homeostasis or other developmental  
561 processes, which begin perinatally or early postnatally. Due to the presence of cel-miR-39-5p in  
562 AGO2-immunocomplexes, we assume that its bloodstream enrichment could simply lag behind cel-  
563 miR-39-3p instead of being selectively excluded. However, the mechanistic details of miRNA  
564 transport and selection criteria for AGO2-loading remain unknown so far.

565 Taken together, our experimental trajectory suggests that dietary uptake of milk miRNAs can lead to  
566 their loading onto AGO2 in neonatal intestinal epithelial cells. Thus, vertical transmission of maternal  
567 milk miRNA signals via GI transit to responsive cells and systemic bloodstream distribution is  
568 apparently possible. This is in agreement with the ‘functional hypothesis’ but contradicts the ‘non-  
569 functional’ hypothesis that milk miRNAs could solely serve as a nucleoside source for the newborn  
570 (54). Our tracer experiments provide good experimental justification to address superordinate  
571 questions about milk miRNA-induced PTGS in neonates. However, key questions remain unanswered:  
572 we have no clear idea which of the hundreds of different miRNAs found in milk, with different  
573 abundances, could be important and how selective loading of AGO2 in milk miRNA-responsive cells  
574 could work. It is possible that only some specific miRNAs find specific mRNA duplex partners,  
575 depending on their presence in specific cell types and transcriptional timing. An important future  
576 concept to look into further will be the exact mechanisms of milk miRNA packaging, transport and  
577 uptake by recipient cells via EVs. Systemically, it remains unknown how far-reaching and selective  
578 milk miRNAs’ influence could be. Could biologically relevant miRNA accumulation be restricted to  
579 the intestine, or does their observation in the bloodstream indicate a systemic distribution to other  
580 target tissues/cells? As important as the place of milk miRNA activity is the time of action during  
581 ontogeny. The possibly most convincing period could be during a relatively narrow ‘window of  
582 opportunity’ that could open perinatally and persist during the introduction of enteral feeding, when  
583 the infant’s intestine develops as an environment-organism interface to coordinate microbiome  
584 homeostasis.



585 If anticipating a vertical transmission of PTGS via milk miRNAs the superordinate problem is, which  
586 mRNAs are true targets. In this work, we have found weak evidence for DDX3 targeting through bta-  
587 mir-677 in HIEC-6 cells. The underlying experiments relied on a mRNA target prediction algorithm,  
588 whose results were probably superimposed by several false-positive predictions of miRNA-mRNA  
589 interactions. Clearly, target prediction depending mostly of 5'-seed complementarity remains leaky for  
590 simple reasons: First, because searches for sequence matches in mRNA databases usually cannot  
591 consider whether a potential target is transcribed in a cell or tissue-of-interest or not. Second,  
592 prediction algorithms do not consider that within a cell different miRNAs and mRNAs compete for  
593 being loaded to a limited number of Argonaute (Ago) proteins [29]. Moreover, given that mRNA  
594 decay and blocking of translation exist as alternative miRNA interference mechanisms, it is not clear  
595 whether PTGS can be detectable directly on the mRNA level and/or the protein level only.  
596 Consequently, the identification of valid miRNA-target interactions and their influence on gene  
597 regulatory networks requires detailed experimental analyses. These results suggested that bta-mir-677  
598 expression in HIEC-6 cells could indeed influence the expression of one of the predicted human  
599 mRNA targets, leading to reduced translated DDX3 protein. Even though the latter observation could  
600 give some hint for an influence of bta-miR-677-5p in HIEC-6 cells, the relatively arbitrary putative  
601 target selection and laborious validation is unrewarding and non-holistic. In summary, we have  
602 efficiently applied Ad5-mediated gene transfer in HIEC-6, establishing continuous, but probably non-  
603 natural cellular levels of ectopically expressed miRNAs. This might lead to enforced AGO2-loading  
604 caused by outnumbered availability of the substrate (dog-eat-dog effect). These conditions may not  
605 fully reflect the in vivo situation in the neonate intestine, but nevertheless might be useful to study the  
606 influence of (xenobiotic) milk miRNAs on gene regulatory networks. This approach could plausibly  
607 help to explain the observed increase of severe intestinal complications such as NEC in premature  
608 infants fed with bovine based formula milk. However, we clearly emphasize that postulating potential  
609 harmful influence would be an overstated conclusion from our experiments. But for the first time in  
610 human history, the newest developments in intensive care neonatology allow the survival of extremely  
611 vulnerable preterm neonates, whereby severe complication are often associated with incomplete  
612 intestinal development. Thus, if the 'window of opportunity' hypothesis discussed above holds, the



613 consideration of milk xenomiRs' side effects on early preterm and term neonatal development seems  
614 well justified and would encourage advanced future studies.

615 Finally, we conclude:

- 616 • Dietary-derived miRNAs survived gastrointestinal transit in human newborns, demonstrating  
617 the intestinal enrichment of milk miRNAs.
- 618 • In preterm piglets, cattle-specific miRNAs became enriched in intestinal cells after enteral  
619 feeding with bovine colostrum or formula.
- 620 • Feeding with cel-miR-39-5p/-3p-supplemented colostrum in neonatal preterm piglets led to  
621 bloodstream enrichment of cel-miR-39-3p.
- 622 • Dietary uptake of milk miRNAs can lead to AGO2 loading in neonatal intestinal epithelial  
623 cells, suggesting vertical transmission of maternal milk miRNA signals.
- 624 • We provided experimental justification for further research into milk miRNA-induced post-  
625 transcriptional gene silencing in neonates.
- 626 • Questions remain regarding which miRNAs are important and how selective AGO2 loading in  
627 milk miRNA-responsive cells works, as well as the systemic influence of milk miRNAs.

628

## 629 **Declarations and ethics statement**

### 630 Ethics approval

631 This study was conducted with approval of the Witten/Herdecke University Ethics board (No.  
632 41/2018). A participant flowchart for human and animal milk specimen collection is provided as  
633 Supplemental Figure 2. All animal procedures were approved by the National Council on Animal  
634 Experimentation in Denmark (protocol number 2012-15-293400193). A participant flowchart for  
635 piglet intestinal specimen collection is provided as Supplemental Figure 3. The authors state that they  
636 have obtained appropriate institutional review board approval or have followed the principles outlined  
637 in the Declaration of Helsinki for all human or animal experimental investigations. In addition, for  
638 investigations involving human subjects, informed consent has been obtained from all participants.  
639 Patients or the public were not involved in the design, or conduct, or reporting, or dissemination plans  
640 of our research.

641

642 Informed consent statement

643 Informed written consent was obtained by all involved donors.

644

645 Data availability statement

646 The datasets generated and/or analyzed during the current study are available in the NCBI BioProject  
647 repository as fastq.gz files of miRNA-seq and mRNA-seq (SubmissionIDs: SUB7584111/  
648 SUB9897357/BioProject ID: PRJNA740153/URL: <https://www.ncbi.nlm.nih.gov/bioproject/740153>).

649

650 Competing interests statement

651 All authors declare that there is no conflict of interests.

652

653 Funding

654 This study was funded by the HELIOS Research Centre (JP) and the NEOMUNE research program  
655 (PTS) from the Danish Research Council. University of Copenhagen has filed a patent concerning the  
656 use of bovine colostrum for groups of pediatric patients. The authors have no other relevant  
657 affiliations or financial involvement with any organization or entity with a financial interest in or  
658 financial conflict with the subject matter or materials discussed in the manuscript apart from those  
659 disclosed. No writing assistance was utilized in the production of this manuscript.

660

661 Acknowledgements

662 We gratefully acknowledge Gilles Gasparoni (Institut für Genetik/Epigenetik, Universität des  
663 Saarlandes, Germany) to enable and support our mRNA deep sequencing analyses under hard  
664 conditions during the first European peak period of the SARS-CoV-2 pandemic. We further thank Dr.  
665 Arne Lawrenz (director of Wuppertal Zoo) for providing Okapi (Lomela's) milk as well as Stefan  
666 König (Hof Sackern, Wetter (Ruhr), Germany) for donating bovine colostrum.

667 Authors' responsibilities were as follows: JP and PPW designed the study and wrote the paper. SR  
668 conducted Ad5-mediated miRNA gene transfer experiments under supervision and with the help of

669 FK, FJ and CH. Further, SR prepared mRNA-seq libraries. FK and JS developed the Ad5-mediated  
670 miRNA gene transfer. CAH traced miRNAs in piglet blood and intestine and human stool. MA, AP  
671 and VO performed luciferase experiments. Animal treatments as well as sample collection and  
672 preparation were done by DNN, PPJ and PTS. PPW, FG, TT, MA, ACWJ and SW contributed to  
673 sampling of human and animal milk specimens. PPW, FG, VW and CAH generated RNA libraries,  
674 conducted qPCR experiments and NGS. JP and CAH performed Argonaute pull-down experiments. JP  
675 and PPW supervised undergraduates and graduate students. JP supervised the study, analyzed the data  
676 and wrote the manuscript with the help of PPW, ACWJ, CH and FK. All authors have read and  
677 approved the final manuscript.  
678

## References

1. Enattah NS, Sahi T, Savilahti E, Terwilliger JD, Peltonen L, Jarvela I. Identification of a variant associated with adult-type hypolactasia. *Nat Genet.* 2002;30(2):233-7. doi: 10.1038/ng826.
2. Olds LC, Sibley E. Lactase persistence DNA variant enhances lactase promoter activity in vitro: functional role as a cis regulatory element. *Hum Mol Genet.* 2003;12(18):2333-40. doi: 10.1093/hmg/ddg244.
3. Enattah NS, Jensen TG, Nielsen M, Lewinski R, Kuokkanen M, Rasinpera H, et al. Independent introduction of two lactase-persistence alleles into human populations reflects different history of adaptation to milk culture. *Am J Hum Genet.* 2008;82(1):57-72. doi: 10.1016/j.ajhg.2007.09.012.
4. Enattah NS, Trudeau A, Pimenoff V, Maiuri L, Auricchio S, Greco L, et al. Evidence of still-ongoing convergence evolution of the lactase persistence T-13910 alleles in humans. *Am J Hum Genet.* 2007;81(3):615-25. doi: 10.1086/520705.
5. Tishkoff SA, Reed FA, Ranciaro A, Voight BF, Babbitt CC, Silverman JS, et al. Convergent adaptation of human lactase persistence in Africa and Europe. *Nat Genet.* 2007;39(1):31-40. doi: 10.1038/ng1946.
6. Brandt G, Szecsenyi-Nagy A, Roth C, Alt KW, Haak W. Human paleogenetics of Europe--the known knowns and the known unknowns. *J Hum Evol.* 2015;79:73-92. doi: 10.1016/j.jhevol.2014.06.017.
7. Gerbault P. The onset of lactase persistence in Europe. *Hum Hered.* 2013;76(3-4):154-61. doi: 10.1159/000360136.
8. Segurel L, Bon C. On the Evolution of Lactase Persistence in Humans. *Annu Rev Genomics Hum Genet.* 2017;18:297-319. doi: 10.1146/annurev-genom-091416-035340.
9. Beja-Pereira A, Luikart G, England PR, Bradley DG, Jann OC, Bertorelle G, et al. Gene-culture coevolution between cattle milk protein genes and human lactase genes. *Nat Genet.* 2003;35(4):311-3. doi: 10.1038/ng1263.

10. Gerbault P, Liebert A, Itan Y, Powell A, Currat M, Burger J, Swallow DM, Thomas MG. Evolution of lactase persistence: an example of human niche construction. *Philos Trans R Soc Lond B Biol Sci.* 2011;366(1566):863-77. doi: 10.1098/rstb.2010.0268.
11. Nuñez M. Existing Technologies in Non-cow Milk Processing and Traditional Non-cow Milk Products. Edtion ed. In: Tsakalidou E, Papadimitriou K, eds. *Non-Bovine Milk and Milk Products*: Academic Press, 2016:161-85.
12. Shulman RJ, Schanler RJ, Lau C, Heitkemper M, Ou CN, Smith EO. Early feeding, feeding tolerance, and lactase activity in preterm infants. *J Pediatr.* 1998;133(5):645-9. doi: 10.1016/s0022-3476(98)70105-2.
13. Bjornvad CR, Schmidt M, Petersen YM, Jensen SK, Offenbergh H, Elnif J, Sangild PT. Preterm birth makes the immature intestine sensitive to feeding-induced intestinal atrophy. *Am J Physiol Regul Integr Comp Physiol.* 2005;289(4):R1212-22. doi: 10.1152/ajpregu.00776.2004.
14. Lin PW, Stoll BJ. Necrotising enterocolitis. *Lancet.* 2006;368(9543):1271-83. doi: 10.1016/S0140-6736(06)69525-1.
15. Moller HK, Thymann T, Fink LN, Frokiaer H, Kvistgaard AS, Sangild PT. Bovine colostrum is superior to enriched formulas in stimulating intestinal function and necrotising enterocolitis resistance in preterm pigs. *Br J Nutr.* 2011;105(1):44-53. doi: 10.1017/S0007114510003168.
16. Sangild PT, Siggers RH, Schmidt M, Elnif J, Bjornvad CR, Thymann T, et al. Diet- and colonization-dependent intestinal dysfunction predisposes to necrotizing enterocolitis in preterm pigs. *Gastroenterology.* 2006;130(6):1776-92. doi: 10.1053/j.gastro.2006.02.026.
17. Bartel DP. MicroRNAs: target recognition and regulatory functions. *Cell.* 2009;136(2):215-33. doi: 10.1016/j.cell.2009.01.002.
18. Brennecke J, Stark A, Russell RB, Cohen SM. Principles of microRNA-target recognition. *PLoS Biol.* 2005;3(3):e85. doi: 10.1371/journal.pbio.0030085.
19. Chipman LB, Pasquinelli AE. miRNA Targeting: Growing beyond the Seed. *Trends Genet.* 2019;35(3):215-22. doi: 10.1016/j.tig.2018.12.005.
20. Djuranovic S, Nahvi A, Green R. A parsimonious model for gene regulation by miRNAs. *Science.* 2011;331(6017):550-3. doi: 10.1126/science.1191138.
21. Weber JA, Baxter DH, Zhang S, Huang DY, Huang KH, Lee MJ, Galas DJ, Wang K. The microRNA spectrum in 12 body fluids. *Clin Chem.* 2010;56(11):1733-41. doi: 10.1373/clinchem.2010.147405.
22. Chen X, Gao C, Li H, Huang L, Sun Q, Dong Y, et al. Identification and characterization of microRNAs in raw milk during different periods of lactation, commercial fluid, and powdered milk products. *Cell Res.* 2010;20(10):1128-37. doi: 10.1038/cr.2010.80.
23. Makarova J, Turchinovich A, Shkurnikov M, Tonevitsky A. Extracellular miRNAs and Cell-Cell Communication: Problems and Prospects. *Trends Biochem Sci.* 2021;46(8):640-51. doi: 10.1016/j.tibs.2021.01.007.
24. Melnik BC. Milk: an epigenetic amplifier of FTO-mediated transcription? Implications for Western diseases. *J Transl Med.* 2015;13:385. doi: 10.1186/s12967-015-0746-z.
25. Melnik BC. Milk disrupts p53 and DNMT1, the guardians of the genome: implications for acne vulgaris and prostate cancer. *Nutr Metab (Lond).* 2017;14:55. doi: 10.1186/s12986-017-0212-4.
26. Melnik BC, Schmitz G. Milk's Role as an Epigenetic Regulator in Health and Disease. *Diseases.* 2017;5(1). doi: 10.3390/diseases5010012.

27. Title AC, Denzler R, Stoffel M. Uptake and Function Studies of Maternal Milk-derived MicroRNAs. *J Biol Chem*. 2015;290(39):23680-91. doi: 10.1074/jbc.M115.676734.
28. Kahn S, Liao Y, Du X, Xu W, Li J, Lonnerdal B. Exosomal MicroRNAs in Milk from Mothers Delivering Preterm Infants Survive in Vitro Digestion and Are Taken Up by Human Intestinal Cells. *Mol Nutr Food Res*. 2018;62(11):e1701050. doi: 10.1002/mnfr.201701050.
29. Manca S, Upadhyaya B, Mutai E, Desaulniers AT, Cederberg RA, White BR, Zempleni J. Milk exosomes are bioavailable and distinct microRNA cargos have unique tissue distribution patterns. *Sci Rep*. 2018;8(1):11321. doi: 10.1038/s41598-018-29780-1.
30. Lin D, Chen T, Xie M, Li M, Zeng B, Sun R, et al. Oral Administration of Bovine and Porcine Milk Exosome Alter miRNAs Profiles in Piglet Serum. *Sci Rep*. 2020;10(1):6983. doi: 10.1038/s41598-020-63485-8.
31. Lopez de Las Hazas MC, Del Pozo-Acebo L, Hansen MS, Gil-Zamorano J, Mantilla-Escalante DC, Gomez-Coronado D, Marin F, Garcia-Ruiz A, Rasmussen JT, Davalos A. Dietary bovine milk miRNAs transported in extracellular vesicles are partially stable during GI digestion, are bioavailable and reach target tissues but need a minimum dose to impact on gene expression. *Eur J Nutr*. 2022;61(2):1043-56. doi: 10.1007/s00394-021-02720-y.
32. Mutai E, Ramer-Tait AE, Zempleni J. MicroRNAs in bovine milk exosomes are bioavailable in humans but do not elicit a robust pro-inflammatory cytokine response. *ExRNA*. 2020;2(1):2. doi: 10.1186/s41544-019-0041-x.
33. Perge P, Nagy Z, Decmann A, Igaz I, Igaz P. Potential relevance of microRNAs in inter-species epigenetic communication, and implications for disease pathogenesis. *RNA Biol*. 2017;14(4):391-401. doi: 10.1080/15476286.2016.1251001.
34. Willems R, Krych L, Rybicki V, Jiang P, Sangild PT, Shen RL, Hensel KO, Wirth S, Postberg J, Jenke AC. Introducing enteral feeding induces intestinal subclinical inflammation and respective chromatin changes in preterm pigs. *Epigenomics*. 2015;7(4):553-65. doi: 10.2217/epi.15.13.
35. Thorell L, Sjoberg LB, Hernell O. Nucleotides in human milk: sources and metabolism by the newborn infant. *Pediatr Res*. 1996;40(6):845-52. doi: 10.1203/00006450-199612000-00012.
36. Wijenayake S, Eisha S, Tawhidi Z, Pitino MA, Steele MA, Fleming AS, McGowan PO. Comparison of methods for pre-processing, exosome isolation, and RNA extraction in unpasteurized bovine and human milk. *PLoS One*. 2021;16(9):e0257633. doi: 10.1371/journal.pone.0257633.
37. Weil PP, Jaszczyszyn Y, Baroin-Tourancheau A, Postberg J, Amar L. Holistic and Affordable Analyses of MicroRNA Expression Profiles Using Tagged cDNA Libraries and a Multiplex Sequencing Strategy. *Methods Mol Biol*. 2017;1654:179-96. doi: 10.1007/978-1-4939-7231-9\_12.
38. Chen Y, Wang X. miRDB: an online database for prediction of functional microRNA targets. *Nucleic Acids Res*. 2020;48(D1):D127-D31. doi: 10.1093/nar/gkz757.
39. Livak KJ, Schmittgen TD. Analysis of relative gene expression data using real-time quantitative PCR and the 2<sup>-ΔΔC(T)</sup> Method. *Methods*. 2001;25(4):402-8. doi: 10.1006/meth.2001.1262.
40. Blankenberg D, Von Kuster G, Coraor N, Ananda G, Lazarus R, Mangan M, Nekrutenko A, Taylor J. Galaxy: a web-based genome analysis tool for experimentalists. *Curr Protoc Mol Biol*. 2010;Chapter 19:Unit 19 0 1-21. doi: 10.1002/0471142727.mb1910s89.

41. Giardine B, Riemer C, Hardison RC, Burhans R, Elnitski L, Shah P, et al. Galaxy: a platform for interactive large-scale genome analysis. *Genome Res.* 2005;15(10):1451-5. doi: 10.1101/gr.4086505.
42. Goecks J, Nekrutenko A, Taylor J, Galaxy T. Galaxy: a comprehensive approach for supporting accessible, reproducible, and transparent computational research in the life sciences. *Genome Biol.* 2010;11(8):R86. doi: 10.1186/gb-2010-11-8-r86.
43. Vitsios DM, Enright AJ. Chimira: analysis of small RNA sequencing data and microRNA modifications. *Bioinformatics.* 2015;31(20):3365-7. doi: 10.1093/bioinformatics/btv380.
44. Aparicio-Puerta E, Lebron R, Rueda A, Gomez-Martin C, Giannoukakos S, Jaspez D, et al. sRNAbench and sRNAtoolbox 2019: intuitive fast small RNA profiling and differential expression. *Nucleic Acids Res.* 2019;47(W1):W530-W5. doi: 10.1093/nar/gkz415.
45. Griffiths-Jones S, Grocock RJ, van Dongen S, Bateman A, Enright AJ. miRBase: microRNA sequences, targets and gene nomenclature. *Nucleic Acids Res.* 2006;34(Database issue):D140-4. doi: 10.1093/nar/gkj112.
46. Nelson PT, De Planell-Saguer M, Lamprinaki S, Kiriakidou M, Zhang P, O'Doherty U, Mourelatos Z. A novel monoclonal antibody against human Argonaute proteins reveals unexpected characteristics of miRNAs in human blood cells. *RNA.* 2007;13(10):1787-92. doi: 10.1261/rna.646007.
47. Kratzer RF, Kreppel F. Production, Purification, and Titration of First-Generation Adenovirus Vectors. *Methods Mol Biol.* 2017;1654:377-88. doi: 10.1007/978-1-4939-7231-9\_28.
48. Blankenberg D, Gordon A, Von Kuster G, Coraor N, Taylor J, Nekrutenko A, Galaxy T. Manipulation of FASTQ data with Galaxy. *Bioinformatics.* 2010;26(14):1783-5. doi: 10.1093/bioinformatics/btq281.
49. Kim D, Pertea G, Trapnell C, Pimentel H, Kelley R, Salzberg SL. TopHat2: accurate alignment of transcriptomes in the presence of insertions, deletions and gene fusions. *Genome Biol.* 2013;14(4):R36. doi: 10.1186/gb-2013-14-4-r36.
50. Thery C, Witwer KW, Aikawa E, Alcaraz MJ, Anderson JD, Andriantsitohaina R, et al. Minimal information for studies of extracellular vesicles 2018 (MISEV2018): a position statement of the International Society for Extracellular Vesicles and update of the MISEV2014 guidelines. *J Extracell Vesicles.* 2018;7(1):1535750. doi: 10.1080/20013078.2018.1535750.
51. Zoppelli L, Guttel C, Bittrich HJ, Andree C, Wirth S, Jenke A. Fecal calprotectin concentrations in premature infants have a lower limit and show postnatal and gestational age dependence. *Neonatology.* 2012;102(1):68-74. doi: 10.1159/000337841.
52. Muk T, Stensballe A, Pankratova S, Nguyen DN, Brunse A, Sangild PT, Jiang PP. Rapid Proteome Changes in Plasma and Cerebrospinal Fluid Following Bacterial Infection in Preterm Newborn Pigs. *Front Immunol.* 2019;10:2651. doi: 10.3389/fimmu.2019.02651.
53. Scholz J, Weil PP, Pembaur D, Koukou G, Aydin M, Hauert D, Postberg J, Kreppel F, Hagedorn C. An Adenoviral Vector as a Versatile Tool for Delivery and Expression of miRNAs. *Viruses.* 2022;14(9). doi: 10.3390/v14091952.
54. Melnik BC, Kakulas F, Geddes DT, Hartmann PE, John SM, Carrera-Bastos P, Cordain L, Schmitz G. Milk miRNAs: simple nutrients or systemic functional regulators? *Nutr Metab (Lond).* 2016;13:42. doi: 10.1186/s12986-016-0101-2.

## Figures legends

### Figure 1. Comparative profiling of mammalian milk miRNAs.

**A.** Phylogenetic tree of specimens under analysis (red font), which included mostly domesticated species with the exception of okapi (ojo) and human (hsa). Additionally, we determined miRNA profiles from yak cheese and water buffalo cheese (light red font), which are part of the available dataset, but are not part of the below analyses due to insufficient total read counts and quality. **B.** Heat map of miRNAs conserved in all taxa analyzed. Only the top 100 miRNAs found in all species are shown robustly representing over 90% of the total read count in all specimens (see values below each column). A color gradient was used for the visualization of each miRNA's abundance (read counts per million; CPM) in each specimen. MicroRNAs were sorted in descending order with reference to the median CPM of human specimens. **C.** Results of principal component analyses of microRNAs shared by all taxa under investigation. Quadrants I and IV (section magnified on the right) harbor all specimens whereby all human specimens (blue: hsa1-7) are clustering. Slightly separated is a separated scattered cluster harboring all herbivorous specimens (yellow to green: bta1-4, cae1-2, eas, eca, ogm, ojo) and one dog specimen (red arrow: clu). Above is a mini-cluster comprising both porcine specimens (pink: ssc1-2) and separated the cat specimen (red: fca). **D.** Venn diagram showing that the numbers of pre-miRNAs (pre-mir) shared by all or some taxa or, respectively, which were identified being taxon-specific. For this analysis pre-mir counts were used rather than miR-counts to counteract a potential differential taxon-specific 5p-/3p-dominant processing. **E.** Heat map of the top 50 *Bos taurus* (bta)-specific pre-mir in raw and industrially processed milk specimens (n=18) in comparison with powdered milk/formula product specimens (n=11). The median CPM (mapped reads count per million) was used as sorting criterion in descending order. Red font: miRNA was used for human mRNA target prediction via the sequence-based custom prediction option of miRDB (38). Cave! Bovidae in heat map include goat and sheep, whereas ranks were determined from cattle only. **F.** Quantitative analysis of total miRNA read counts in raw and industrially processed milk specimens (n=18) in comparison with powdered milk/formula product specimens (n=11).

**Figure 2.** *Xenobiotic bta-miRs survive the gastrointestinal passage in human preterm neonates, and in preterm piglets they become enriched in intestinal epithelial cells.*

**A.** This chart shows the enrichment of bovine (bta) miRNAs in infant stool when fed with formula.

Results were obtained via qPCR for selected bta-miRs. For comparison, pan-miR-143-3p that is shared by humans and cattle is shown (red box, 'pan' prefix means that a miRNA is indistinguishable in humans and cattle). The relative enrichment was normalized with respect to pan-miR-99b-5p using the  $\Delta\Delta C_t$  method. For each PCR, we analyzed n=20 specimens with at least 3 replicated for each set of primers.

**B.** Heat map of miRNAs detected in enriched porcine preterm neonatal intestinal cells (n=14 specimens) following 9 days of enteral bovine colostrum/formula supplementation. Only the top 50 miRNAs found in all species are shown. A color gradient was used for the visualization of each miRNA's abundance (read counts per million; CPM) in each specimen. MicroRNAs were sorted in descending order with reference to the median CPM of all specimens. Prefix 'pan' for miRNA denotes that it is present in multiple species (here: pig and cattle)

**Figure 3.** *Reporter cel-miR-39-3p accumulates in the bloodstream and cel-miR-39-5p/-3p co-precipitate with Argonaute/AGO2 from homogenized intestinal biopsies.*

**A.** Small RNAs were analyzed via microvolume electrophoresis using a DNA 1000 chip and the Agilent Bioanalyzer 2100 (top) as well as PAGE (bottom). Abbreviations: L (ladder), 1 (hsa exosomes), 2 (has supernatant), 3 (bta exosomes), 4 (bta supernatant), 5 (ssc exosomes), 6 (ssc supernatant).

**B.** Results of assessment of spiked cel-miR-39-5p/-3p in the exosome fractions of human, bovine or porcine colostrum via qPCR. The y-axis shows the relative fold-change enrichment of spiked cel-miRs or endogenous control miRs versus NTC as determined by the  $\Delta\Delta C_t$  method. U6 snRNA was used for normalization. Importantly, because the amount of cel-miR-39-5p/3p in the NTC is zero, it is not possible to calculate the enrichment by fold change with conventional methods, as dividing by zero is undefined. As an approach, we therefore considered the CT values corresponding to the unspecific cel-miR-39-5p/-3p amplification as pseudo counts. **C.** Results of qPCR to trace the cel-miR-39-5p/3p reporter in the bloodstream. The yellow shaded infobox within the chart illustrates the *C. elegans* (cel)-mir-39 hairpin. Prospective guide and passenger strand sequences, which were



source for spiked in reporter miRNAs, are highlighted for cel-miR-39-5p (blue) and cel-miR-39-3p (red). Accordingly, these colors were used for the qPCR amplification data points of the detected cel-miR-39-5p/3p-amplicons (below) from blood serum samples. Normalization of cel-miR-39-5p and cel-miR-39-3p was performed using endogenous pan-miR-143-3p, pan-miR-99b-5p or pan-let-7b-5p, respectively. Blue rhomboid data points: cel-miR-39-5p (POS; cel-miR-39 feeding); red rhomboid data points: cel-miR-39-3p (POS; cel-miR-39 feeding); triangular data points: (NEG; no cel-miR-39 supplementation). **D.** Using Chimira (43) for analyses of small RNA sequencing raw data from n=3 piglet blood serum miRNA-libraries and selecting '*C. elegans*' as species option, we identified cel-miR-39-3p (avg. 95 raw read counts). For comparison, matching cel-let-7-5p (avg. 2145 raw read counts, sequence identity to ssc-let-7a-5p [nt 1-22]) and cel-miR-72-5p (avg. 22 raw read counts, probably being identified as ssc-miR-31-5p [1nt mismatch]) are shown as well as ambiguous matches for cel-miR-5592-3p (avg. 17 raw read counts) and cel-miR-1818 (avg. 5 raw read counts). Notably, the charts y-axis is DESeq2 normalized read counts. **E.** Qualitative evidence for the presence of cel-miR-39-5p and cel-miR-39-3p in AGO2 immunocomplexes was achieved, when monoclonal mouse pan-argonaute/AGO2 antibodies (Sigma-Aldrich, MABE56, clone 2A8 (46)) were used for pull-down experiments from n=3 intestinal tissue samples. Prior to qPCR miRNA cDNA libraries were prepared from co-precipitated small RNAs. The chart exhibits quantitative differences between pulled-down cel-miR-39-5p and cel-miR-39-3p. Relative fold-changes with respect to the cel-miR-39-3p median were determined using the  $\Delta\Delta C_t$  method and miR-143-3p as well as miR-99b-5p for normalization.

**Figure 4.** Tests for the suppression of predicted human mRNA targets of bta-miR-677-5p on the protein level for selected candidates and for 4 bta-miRs on the whole transcriptome level.

**A.** Transcription patterns are shown for selected genes, which are markers for primary fetal epithelial cells or selected cellular processes. Our goal was to rule out that Ad5 treatment could induce massive off-target effects, such as dedifferentiation, changes in epigenome plasticity, changes in proliferation, loss of parts of the RNAi machinery. Mapped raw read counts reflect HIEC-6 gene expression profiles (untreated HIEC-6 and HIEC-6, which underwent Ad5-mediated miRNA gene transfer, i.e. nonsense miR, bta-miR-677-5p, bta-miR-2400-5p, bta-miR-2440-3p, bta-miR-2361-5p). Selected groups of

genes are shown: gene expression related to miRNA biogenesis and RNAi activity (blue asterisks), intestinal epithelial cell markers and innate immunity gene expression (orange asterisks); DNA methylation and chromatin structure related gene expression (green asterisks); cell cycle and proliferation related gene expression (grey asterisk). Untreated HIEC-6 are highlighted in each data column through darker colored asterisks. Each red line marks the median read count for each data column. **B.** Immunofluorescence microscopy revealed no differences in the nuclear localization of ATRX upon Ad5-mediated bta-miR-677 gene transfer into primary HIEC-6 cells. ATRX predominantly exhibited nuclear localization and therein we observed focal accumulations in wt-HIEC-6 as well as in bta-mir-677-treated HIEC-6 and ctrl-mir-treated HIEC-6. We routinely focused our view to areas wherein cells exhibited GFP-signals of different intensity. This should enable us to detect differences in ATRX distribution, which hypothetically could depend on the level of expressed bta-mir-677. Again, no differences were seen between treated cells and untreated controls. Notably, for PLCXD3 no reliable signals were observed in HIEC-6 cells at all. **C.** When normalized with the GAPDH, no differences in the abundances of ATRX or ZHX1 were observed upon Ad5-mediated bta-miR-677 gene transfer into primary HIEC-6 cells in Western analyses, when compared to wild-type (wt) HIEC-6 (not shown) or HIEC-6 expressing a control-mir. Using two replicative measurements for quantitative Western Blot analyses via LI-COR Empiria Studio Software, we measured a 24.45% (SD:  $\pm 1.68\%$ ) DDX3 signal reduction in bta-mir-677-treated vs. wt and, respectively, a 37.90% (SD:  $\pm 1.90\%$ ) DDX3 signal reduction in bta-mir-treated vs. ctrl-mir-treated HIEC-6. **D.** Effects of Ad5-mediated expression of 3 selected bta-miRs were studied in HIEC-6 (bta-miR-677-5p; bta-miR-2440-3p; bta-miR-2361-5p) in comparison to HIEC-6 expressing a Ad5-mediated nonsense-miR. Relative fold-changes were compared for the whole HIEC-6 transcriptome and the lists of expressed predicted targets. Predicted targets for each bta-miR comprised of hundreds of mRNAs (i.e. bta-miR-677-5p [n=655]; bta-miR-2440-3p [n=805]; bta-miR-2361-5p [n=728]). Statistical power calculations were done using the nonparametric Wilcoxon–Mann–Whitney method and GraphPad Prism 8.4.3 software.

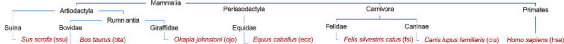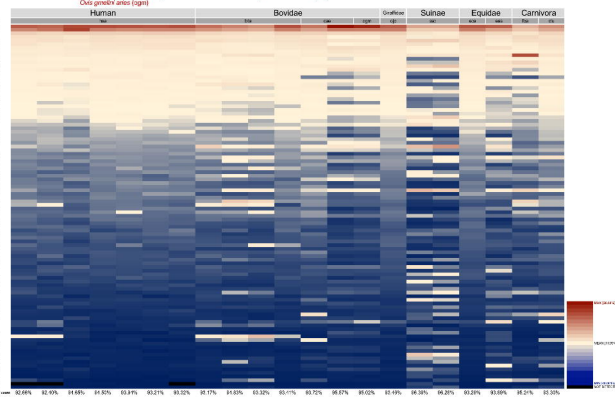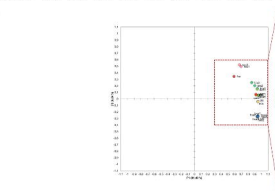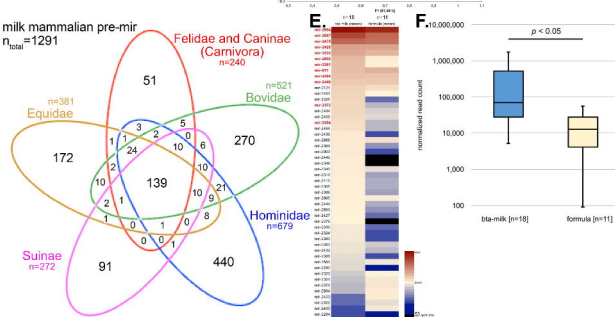

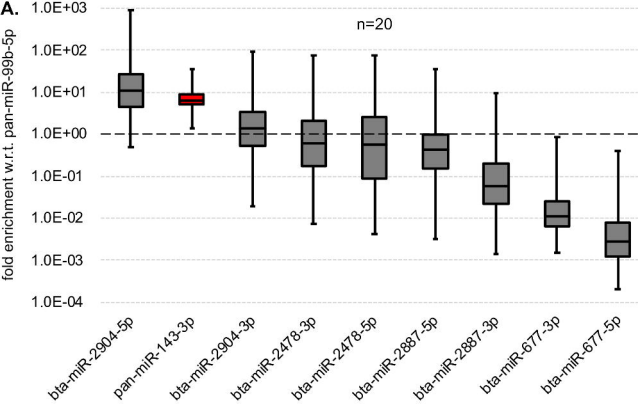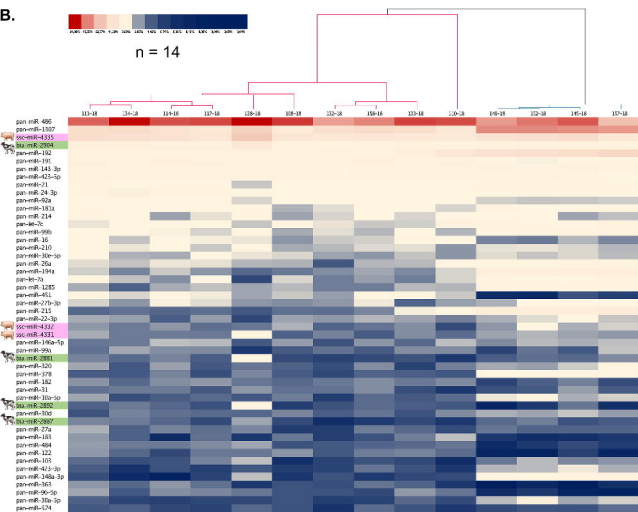



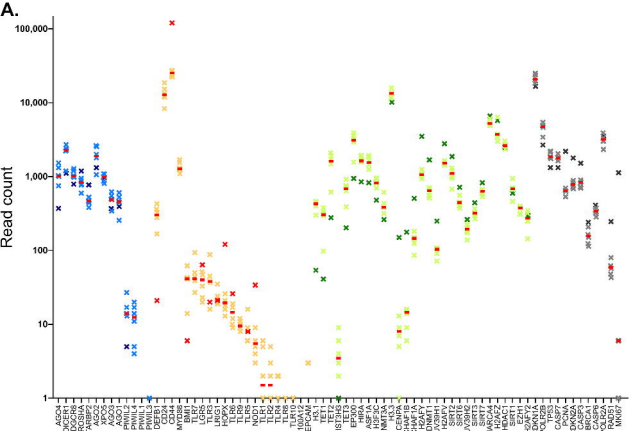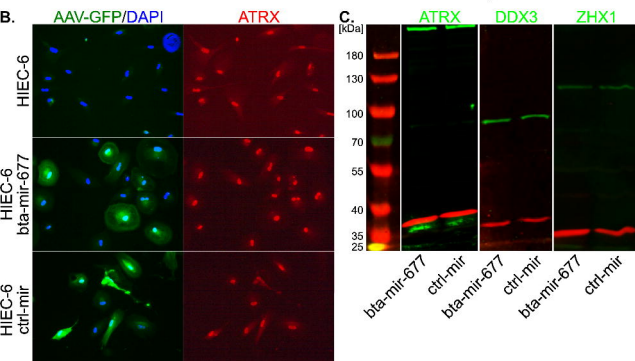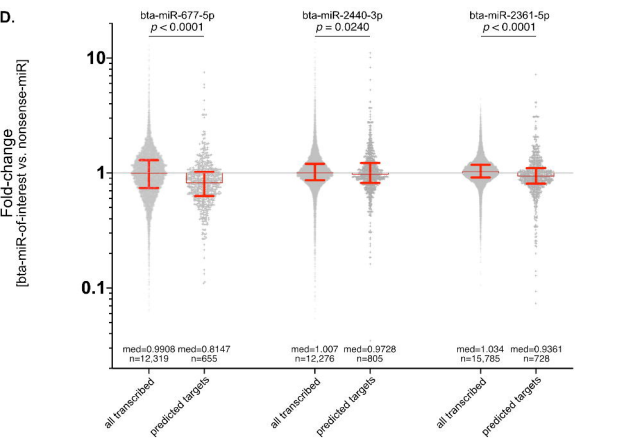

Source: https://medrxiv.org/content/10.1101/2021.08.24.21262525v8.full.pdf
