# Supplementary material for: Uncovering the gastrointestinal passage, intestinal epithelial cellular uptake and AGO2 loading of milk miRNAs in neonates using xenomiRs as tracers
Source: bioRxiv or medRxiv preprint supplement (doi:10.1101/2021.08.24.21262525), 2023-03-20
Supplement: Supplementary file [file media-2.pdf]

|             | Homidae vs. Bovidae | Homidae vs. Suidae | Bovidae vs. Suidae | Homidae vs. Bovidae | Homidae vs. Suidae | Bovidae vs. Suidae | Homidae vs. Bovidae | Homidae vs. Suidae | Bovidae vs. Suidae | Omnivores vs. Herbivores | Omnivores vs. Carnivores | Herbivores vs. Carnivores | Omnivores vs. Herbivores | Omnivores vs. Carnivores | Herbivores vs. Carnivores | Omnivores vs. Herbivores | Omnivores vs. Carnivores | Herbivores vs. Carnivores |
|-------------|---------------------|--------------------|--------------------|---------------------|--------------------|--------------------|---------------------|--------------------|--------------------|--------------------------|--------------------------|---------------------------|--------------------------|--------------------------|---------------------------|--------------------------|--------------------------|---------------------------|
| miR-143-3p  | 0.19750             | <0.0001            | <0.0001            | ns                  | ns                 | ns                 | ns                  | ns                 | ns                 | 0.00640                  | <0.0001                  | <0.0001                   | **                       | ***                      | ***                       | ns                       | ns                       | ns                        |
| miR-192-5p  | <0.0001             | <0.0001            | <0.0001            | ***                 | ***                | ***                | ns                  | ns                 | ns                 | 0.26900                  | <0.0001                  | <0.0001                   | ns                       | ***                      | ***                       | ns                       | ns                       | ns                        |
| miR-21-5p   | 0.13720             | <0.0001            | 0.01760            | ns                  | ***                | *                  | ns                  | ns                 | ns                 | 0.91420                  | 0.43490                  | 0.57500                   | ns                       | ns                       | ns                        | ns                       | ns                       | ns                        |
| let-7b-5p   | 0.32970             | 0.07160            | 0.74340            | ns                  | ns                 | ns                 | ns                  | ns                 | ns                 | 0.84940                  | 0.45980                  | 0.28040                   | ns                       | ns                       | ns                        | ns                       | ns                       | ns                        |
| miR-26a-5p  | >0.9999             | 0.00140            | 0.00110            | ns                  | **                 | **                 | ns                  | ns                 | ns                 | 0.34260                  | 0.97700                  | 0.80840                   | ns                       | ns                       | ns                        | ns                       | ns                       | ns                        |
| miR-16-5p   | 0.29940             | 0.98890            | 0.97460            | ns                  | ns                 | ns                 | ns                  | ns                 | ns                 | 0.34480                  | 0.99170                  | 0.76230                   | ns                       | ns                       | ns                        | ns                       | ns                       | ns                        |
| miR-194-5p  | >0.9999             | 0.38760            | 0.41790            | ns                  | ns                 | ns                 | ns                  | ns                 | ns                 | 0.80870                  | 0.91740                  | 0.72300                   | ns                       | ns                       | ns                        | ns                       | ns                       | ns                        |
| miR-10a-5p  | 0.99870             | 0.76460            | 0.59740            | ns                  | ns                 | ns                 | ns                  | ns                 | ns                 | 0.84470                  | 0.94090                  | 0.78450                   | ns                       | ns                       | ns                        | ns                       | ns                       | ns                        |
| miR-141-3p  | 0.91860             | 0.58910            | 0.93360            | ns                  | ns                 | ns                 | ns                  | ns                 | ns                 | 0.88260                  | <0.0001                  | <0.0001                   | ns                       | ***                      | ***                       | ns                       | ns                       | ns                        |
| miR-375     | 0.97040             | 0.31140            | 0.64250            | ns                  | ns                 | ns                 | ns                  | ns                 | ns                 | 0.97910                  | 0.98280                  | 0.95310                   | ns                       | ns                       | ns                        | ns                       | ns                       | ns                        |
| miR-200a-3p | 0.98860             | 0.57600            | 0.83100            | ns                  | ns                 | ns                 | ns                  | ns                 | ns                 | 0.86860                  | 0.02490                  | 0.05170                   | ns                       | *                        | ns                        | ns                       | ns                       | ns                        |
| miR-181a-5p | 0.98930             | <0.0001            | <0.0001            | ns                  | ***                | ***                | ns                  | ns                 | ns                 | 0.25670                  | 0.85860                  | 0.91420                   | ns                       | ns                       | ns                        | ns                       | ns                       | ns                        |
| miR-215-5p  | 0.99890             | 0.99570            | 0.97230            | ns                  | ns                 | ns                 | ns                  | ns                 | ns                 | 0.76520                  | 0.69370                  | 0.43200                   | ns                       | ns                       | ns                        | ns                       | ns                       | ns                        |
| miR-24-3p   | 0.91220             | 0.39220            | 0.81790            | ns                  | ns                 | ns                 | ns                  | ns                 | ns                 | 0.96450                  | 0.98490                  | 0.99990                   | ns                       | ns                       | ns                        | ns                       | ns                       | ns                        |
| miR-486-5p  | 0.90970             | 0.15080            | 0.50920            | ns                  | ns                 | ns                 | ns                  | ns                 | ns                 | 0.98130                  | 0.45950                  | 0.51990                   | ns                       | ns                       | ns                        | ns                       | ns                       | ns                        |
| miR-99b-5p  | >0.9999             | 0.89730            | 0.84670            | ns                  | ns                 | ns                 | ns                  | ns                 | ns                 | 0.89160                  | 0.97520                  | 0.87790                   | ns                       | ns                       | ns                        | ns                       | ns                       | ns                        |
| miR-3960    | 0.83280             | 0.36630            | 0.06370            | ns                  | ns                 | ns                 | ns                  | ns                 | ns                 | 0.31330                  | 0.84190                  | 0.95200                   | ns                       | ns                       | ns                        | ns                       | ns                       | ns                        |
| miR-27a-3p  | 0.96980             | 0.97160            | 0.99990            | ns                  | ns                 | ns                 | ns                  | ns                 | ns                 | 0.86980                  | 0.90560                  | 0.90980                   | ns                       | ns                       | ns                        | ns                       | ns                       | ns                        |
| let-7a-5p   | >0.9999             | 0.96750            | 0.95270            | ns                  | ns                 | ns                 | ns                  | ns                 | ns                 | 0.99120                  | 0.99750                  | >0.9999                   | ns                       | ns                       | ns                        | ns                       | ns                       | ns                        |
| miR-199b-3p | >0.9999             | 0.85090            | 0.89200            | ns                  | ns                 | ns                 | ns                  | ns                 | ns                 | 0.96080                  | 0.87750                  | 0.79170                   | ns                       | ns                       | ns                        | ns                       | ns                       | ns                        |
| miR-378a-3p | 0.99970             | 0.66130            | 0.78030            | ns                  | ns                 | ns                 | ns                  | ns                 | ns                 | 0.98240                  | 0.99140                  | 0.99980                   | ns                       | ns                       | ns                        | ns                       | ns                       | ns                        |
| miR-200b-3p | 0.98780             | 0.91730            | 0.99270            | ns                  | ns                 | ns                 | ns                  | ns                 | ns                 | 0.97510                  | 0.94750                  | 0.89770                   | ns                       | ns                       | ns                        | ns                       | ns                       | ns                        |
| miR-10b-5p  | >0.9999             | 0.91120            | 0.89020            | ns                  | ns                 | ns                 | ns                  | ns                 | ns                 | 0.96020                  | 0.99040                  | 0.95320                   | ns                       | ns                       | ns                        | ns                       | ns                       | ns                        |
| miR-27b-3p  | >0.9999             | >0.9999            | 0.99990            | ns                  | ns                 | ns                 | ns                  | ns                 | ns                 | 0.99290                  | 0.87160                  | 0.83520                   | ns                       | ns                       | ns                        | ns                       | ns                       | ns                        |
| let-7f-5p   | >0.9999             | 0.99950            | 0.99930            | ns                  | ns                 | ns                 | ns                  | ns                 | ns                 | 0.99810                  | 0.98790                  | 0.98130                   | ns                       | ns                       | ns                        | ns                       | ns                       | ns                        |
| miR-191-5p  | >0.9999             | <0.0001            | <0.0001            | ns                  | ***                | ***                | ns                  | ns                 | ns                 | 0.14740                  | 0.39550                  | 0.97780                   | ns                       | ns                       | ns                        | ns                       | ns                       | ns                        |
| miR-92a-3p  | >0.9999             | 0.76980            | 0.75300            | ns                  | ns                 | ns                 | ns                  | ns                 | ns                 | 0.87310                  | 0.88420                  | 0.98180                   | ns                       | ns                       | ns                        | ns                       | ns                       | ns                        |
| miR-25-3p   | >0.9999             | 0.01920            | 0.01560            | ns                  | *                  | *                  | ns                  | ns                 | ns                 | 0.63600                  | 0.80660                  | 0.99530                   | ns                       | ns                       | ns                        | ns                       | ns                       | ns                        |
| miR-320a    | >0.9999             | 0.95840            | 0.95710            | ns                  | ns                 | ns                 | ns                  | ns                 | ns                 | 0.95640                  | 0.99050                  | 0.99930                   | ns                       | ns                       | ns                        | ns                       | ns                       | ns                        |
| miR-23b-3p  | 0.99870             | 0.95540            | 0.99140            | ns                  | ns                 | ns                 | ns                  | ns                 | ns                 | 0.99970                  | >0.9999                  | 0.99970                   | ns                       | ns                       | ns                        | ns                       | ns                       | ns                        |
| miR-150-5p  | 0.99950             | 0.92990            | 0.97620            | ns                  | ns                 | ns                 | ns                  | ns                 | ns                 | >0.9999                  | 0.99100                  | 0.99150                   | ns                       | ns                       | ns                        | ns                       | ns                       | ns                        |
| let-7g-5p   | >0.9999             | >0.9999            | >0.9999            | ns                  | ns                 | ns                 | ns                  | ns                 | ns                 | 0.97190                  | 0.99820                  | 0.97970                   | ns                       | ns                       | ns                        | ns                       | ns                       | ns                        |
| miR-100-5p  | >0.9999             | 0.99740            | 0.99440            | ns                  | ns                 | ns                 | ns                  | ns                 | ns                 | 0.95630                  | 0.96140                  | 0.89950                   | ns                       | ns                       | ns                        | ns                       | ns                       | ns                        |
| miR-1246    | 0.00110             | <0.0001            | <0.0001            | ns                  | **                 | ***                | ***                 | ns                 | ns                 | 0.14010                  | 0.00570                  | 0.11310                   | ns                       | **                       | ns                        | ns                       | ns                       | ns                        |
| let-7f-5p   | 0.99970             | >0.9999            | >0.9999            | ns                  | ns                 | ns                 | ns                  | ns                 | ns                 | 0.97550                  | 0.99630                  | 0.99900                   | ns                       | ns                       | ns                        | ns                       | ns                       | ns                        |
| miR-29a-3p  | 0.99990             | 0.98550            | 0.99630            | ns                  | ns                 | ns                 | ns                  | ns                 | ns                 | 0.99860                  | 0.99950                  | >0.9999                   | ns                       | ns                       | ns                        | ns                       | ns                       | ns                        |
| miR-148a-3p | 0.92990             | 0.98560            | >0.9999            | ns                  | ns                 | ns                 | ns                  | ns                 | ns                 | 0.73290                  | 0.12020                  | 0.27180                   | ns                       | ns                       | ns                        | ns                       | ns                       | ns                        |
| miR-99a-5p  | 0.99890             | 0.99720            | >0.9999            | ns                  | ns                 | ns                 | ns                  | ns                 | ns                 | 0.98160                  | 0.99640                  | 0.98010                   | ns                       | ns                       | ns                        | ns                       | ns                       | ns                        |
| miR-23a-3p  | 0.99990             | 0.99960            | >0.9999            | ns                  | ns                 | ns                 | ns                  | ns                 | ns                 | 0.99360                  | 0.99870                  | 0.99300                   | ns                       | ns                       | ns                        | ns                       | ns                       | ns                        |
| miR-22-3p   | 0.98670             | 0.99200            | 0.91070            | ns                  | ns                 | ns                 | ns                  | ns                 | ns                 | 0.81770                  | 0.99610                  | 0.89720                   | ns                       | ns                       | ns                        | ns                       | ns                       | ns                        |
| miR-93-5p   | >0.9999             | 0.88690            | 0.85070            | ns                  | ns                 | ns                 | ns                  | ns                 | ns                 | 0.92240                  | 0.97590                  | 0.99990                   | ns                       | ns                       | ns                        | ns                       | ns                       | ns                        |
| miR-30d-5p  | 0.99480             | 0.43650            | 0.67080            | ns                  | ns                 | ns                 | ns                  | ns                 | ns                 | 0.98090                  | 0.98190                  | 0.99710                   | ns                       | ns                       | ns                        | ns                       | ns                       | ns                        |
| miR-145-5p  | 0.99620             | >0.9999            | 0.99430            | ns                  | ns                 | ns                 | ns                  | ns                 | ns                 | 0.93040                  | 0.95740                  | 0.99740                   | ns                       | ns                       | ns                        | ns                       | ns                       | ns                        |
| miR-214-3p  | 0.99910             | 0.98820            | 0.99880            | ns                  | ns                 | ns                 | ns                  | ns                 | ns                 | 0.99400                  | 0.99480                  | 0.99930                   | ns                       | ns                       | ns                        | ns                       | ns                       | ns                        |
| miR-126-3p  | 0.99990             | 0.99250            | 0.99840            | ns                  | ns                 | ns                 | ns                  | ns                 | ns                 | 0.99780                  | 0.99850                  | 0.99560                   | ns                       | ns                       | ns                        | ns                       | ns                       | ns                        |
| miR-30a-5p  | 0.45020             | <0.0001            | <0.0001            | ns                  | ***                | ***                | ns                  | ns                 | ns                 | 0.06080                  | 0.21070                  | 0.00660                   | ns                       | ns                       | ns                        | ns                       | **                       | ns                        |
| miR-1307-3p | >0.9999             | 0.99390            | 0.99880            | ns                  | ns                 | ns                 | ns                  | ns                 | ns                 | 0.99810                  | 0.99770                  | 0.99450                   | ns                       | ns                       | ns                        | ns                       | ns                       | ns                        |
| miR-200c-3p | >0.9999             | >0.9999            | >0.9999            | ns                  | ns                 | ns                 | ns                  | ns                 | ns                 | 0.99940                  | 0.99930                  | 0.99820                   | ns                       | ns                       | ns                        | ns                       | ns                       | ns                        |
| miR-146b-5p | 0.00410             | 0.99560            | 0.04060            | ns                  | **                 | *                  | ns                  | ns                 | ns                 | 0.04390                  | 0.00180                  | 0.10530                   | ns                       | *                        | **                        | ns                       | ns                       | ns                        |
| miR-3182    | 0.63880             | 0.98540            | 0.53630            | ns                  | ns                 | ns                 | ns                  | ns                 | ns                 | 0.55060                  | 0.85170                  | 0.99780                   | ns                       | ns                       | ns                        | ns                       | ns                       | ns                        |
| miR-122-5p  | 0.99960             | 0.99260            | 0.99920            | ns                  | ns                 | ns                 | ns                  | ns                 | ns                 | >0.9999                  | 0.99600                  | 0.99990                   | ns                       | ns                       | ns                        | ns                       | ns                       | ns                        |
| miR-146a-5p | 0.99980             | 0.99200            | 0.97270            | ns                  | ns                 | ns                 | ns                  | ns                 | ns                 | 0.96640                  | 0.93920                  | 0.97970                   | ns                       | ns                       | ns                        | ns                       | ns                       | ns                        |
| miR-30e-5p  | >0.9999             | 0.99960            | >0.9999            | ns                  | ns                 | ns                 | ns                  | ns                 | ns                 | 0.99920                  | 0.98160                  | 0.88550                   | ns                       | ns                       | ns                        | ns                       | ns                       | ns                        |
| miR-342-3p  | >0.9999             | 0.99950            | >0.9999            | ns                  | ns                 | ns                 | ns                  | ns                 | ns                 | 0.99640                  | 0.99410                  | 0.99820                   | ns                       | ns                       | ns                        | ns                       | ns                       | ns                        |
| miR-125b-5p | >0.9999             | 0.99880            | 0.99970            | ns                  | ns                 | ns                 | ns                  | ns                 | ns                 | >0.9999                  | 0.97460                  | 0.97220                   | ns                       | ns                       | ns                        | ns                       | ns                       | ns                        |
| miR-151a-5p | 0.99990             | 0.99940            | >0.9999            | ns                  | ns                 | ns                 | ns                  | ns                 | ns                 | 0.99620                  | 0.99330                  | 0.99780                   | ns                       | ns                       | ns                        | ns                       | ns                       | ns                        |
| miR-4454    | >0.9999             | >0.9999            | >0.9999            | ns                  | ns                 | ns                 | ns                  | ns                 | ns                 | 0.99200                  | 0.97060                  | 0.98540                   | ns                       | ns                       | ns                        | ns                       | ns                       | ns                        |
| miR-15b-5p  | >0.9999             | >0.9999            | 0.99930            | ns                  | ns                 | ns                 | ns                  | ns                 | ns                 | 0.97010                  | 0.99380                  | 0.96700                   | ns                       | ns                       | ns                        | ns                       | ns                       | ns                        |
| miR-17-5p   | >0.9999             | 0.99990            | >0.9999            | ns                  | ns                 | ns                 | ns                  | ns                 | ns                 | 0.99940                  | >0.9999                  | >0.9999                   | ns                       | ns                       | ns                        | ns                       | ns                       | ns                        |
| miR-103a-3p | >0.9999             | >0.9999            | >0.9999            | ns                  | ns                 | ns                 | ns                  | ns                 | ns                 | 0.99830                  | 0.99290                  | 0.99640                   | ns                       | ns                       | ns                        | ns                       | ns                       | ns                        |
| miR-423-5p  | 0.98780             | 0.99990            | 0.98480            | ns                  | ns                 | ns                 | ns                  | ns                 | ns                 | 0.87020                  | 0.99980                  | 0.94570                   | ns                       | ns                       | ns                        | ns                       | ns                       | ns                        |
| miR-31-5p   | >0.9999             | 0.99980            | >0.9999            | ns                  | ns                 | ns                 | ns                  | ns                 | ns                 | 0.99980                  | 0.99850                  | 0.99910                   | ns                       | ns                       | ns                        | ns                       | ns                       | ns                        |
| miR-221-3p  | >0.9999             | >0.9999            | >0.9999            | ns                  | ns                 | ns                 | ns                  | ns                 | ns                 | 0.99930                  | 0.99670                  | 0.99820                   | ns                       | ns                       | ns                        | ns                       | ns                       | ns                        |
| miR-125a-5p | >0.9999             | 0.99970            | 0.99980            | ns                  | ns                 | ns                 | ns                  | ns                 | ns                 | 0.99910                  | 0.98630                  | 0.99000                   | ns                       | ns                       | ns                        | ns                       | ns                       | ns                        |
| miR-30b-5p  | >0.9999             | 0.99940            | 0.99960            | ns                  | ns                 | ns                 | ns                  | ns                 | ns                 | 0.99750                  | 0.99780                  | 0.99420                   | ns                       | ns                       | ns                        | ns                       | ns                       | ns                        |
| miR-451a    | >0.9999             | 0.99980            | >0.9999            | ns                  | ns                 | ns                 | ns                  | ns                 | ns                 | 0.99840                  | 0.99900                  | >0.9999                   | ns                       | ns                       | ns                        | ns                       | ns                       | ns                        |
| miR-26b-5p  | >0.9999             | 0.18630            | 0.23310            | ns                  | ns                 | ns                 | ns                  | ns                 | ns                 | 0.84430                  | 0.90840                  | 0.99530                   | ns                       | ns                       | ns                        | ns                       | ns                       | ns                        |
| miR-6087    | >0.9999             | >0.9999            | >0.9999            | ns                  | ns                 | ns                 | ns                  | ns                 | ns                 | 0.97620                  | 0.99980                  | 0.99370                   | ns                       | ns                       | ns                        | ns                       | ns                       | ns                        |
| miR-30c-5p  | >0.9999             | 0.69590            | 0.69900            | ns                  | ns                 | ns                 | ns                  | ns                 | ns                 | 0.89660                  | 0.96610                  | >0.9999                   | ns                       | ns                       | ns                        | ns                       | ns                       | ns                        |
| miR-425-5p  | >0.9999             | >0.9999            | >0.9999            | ns                  | ns                 | ns                 | ns                  | ns                 | ns                 | 0.99560                  | 0.99670                  | 0.99960                   | ns                       | ns                       | ns                        | ns                       | ns                       | ns                        |
| miR-140-3p  | >0.9999             | 0.85600            | 0.87020            | ns                  | ns                 | ns                 | ns                  | ns                 | ns                 | 0.95440                  | 0.96010                  | 0.99430                   | ns                       | ns                       | ns                        | ns                       | ns                       | ns                        |
| miR-532-5p  | >0.9999             | >0.9999            | >0.9999            | ns                  | ns                 | ns                 | ns                  | ns                 | ns                 | 0.99780                  | 0.99820                  | 0.99980                   | ns                       | ns                       | ns                        | ns                       | ns                       | ns                        |
| miR-181b-5p | >0.9999             | 0.99660            | 0.99780            | ns                  | ns                 | ns                 | ns                  | ns                 | ns                 | 0.99470                  | 0.99920                  | 0.99480                   | ns                       | ns                       | ns                        | ns                       | ns                       | ns                        |
| miR-182-5p  | 0.99690             | 0.64460            | 0.83150            | ns                  | ns                 | ns                 | ns                  | ns                 | ns                 | 0.99830                  | 0.91590                  | 0.90050                   | ns                       |                          |                           |                          |                          |                           |
