# Supplementary material for: Uncovering the gastrointestinal passage, intestinal epithelial cellular uptake and AGO2 loading of milk miRNAs in neonates using xenomiRs as tracers
Source: bioRxiv or medRxiv preprint supplement (doi:10.1101/2021.08.24.21262525), 2023-03-20
Supplement: Supplementary file [file media-6.pdf]

Many microRNAs are commonly present in different mammals' milk.

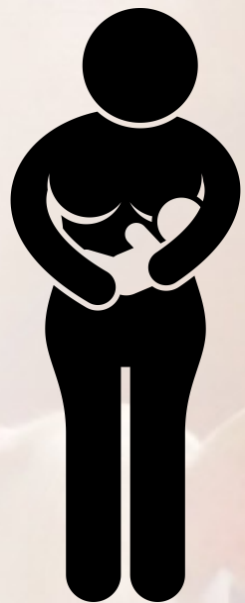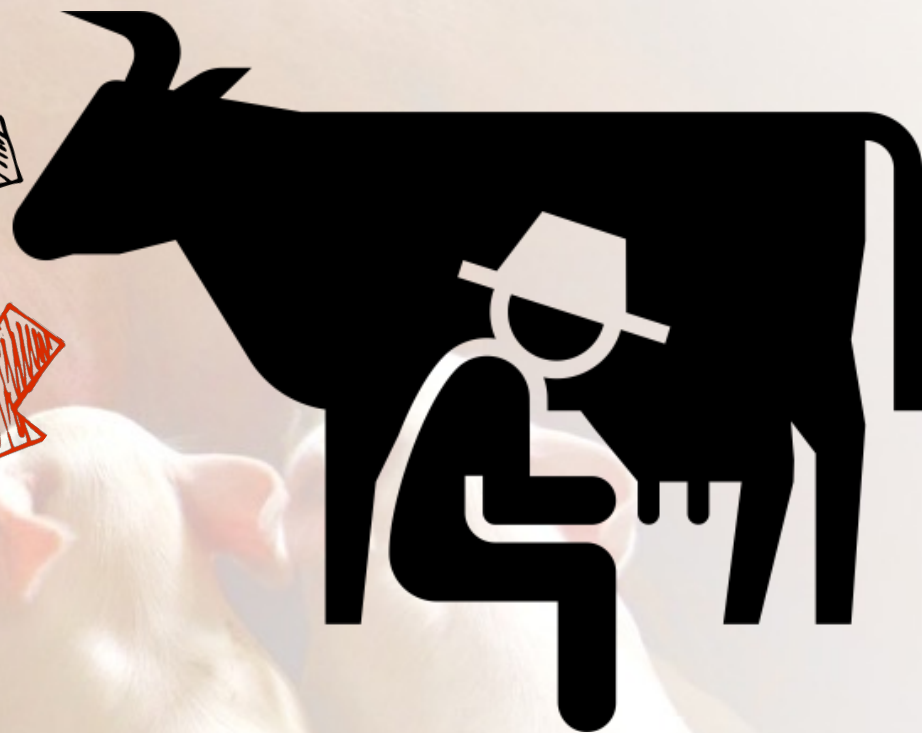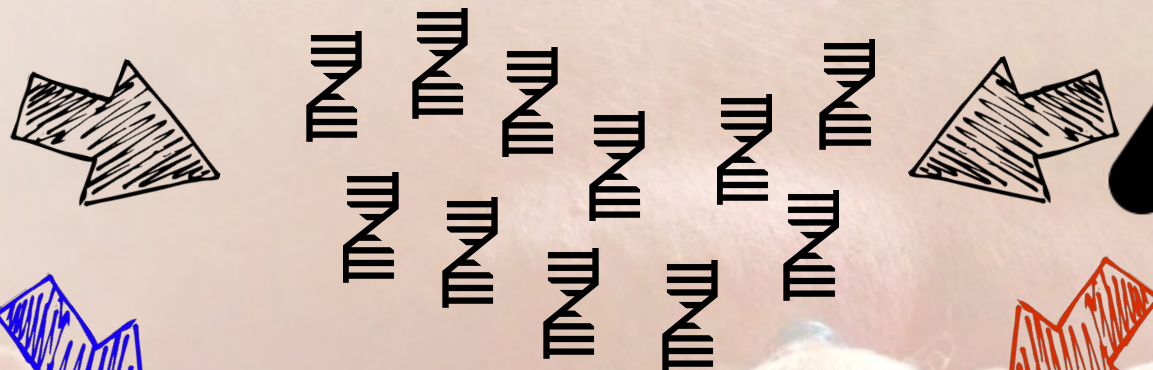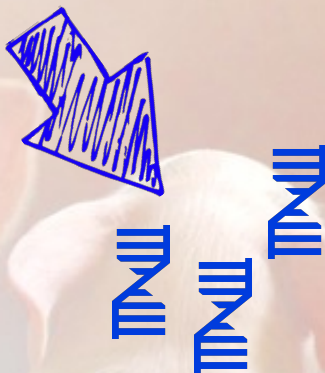

Other microRNAs are taxon-specific.

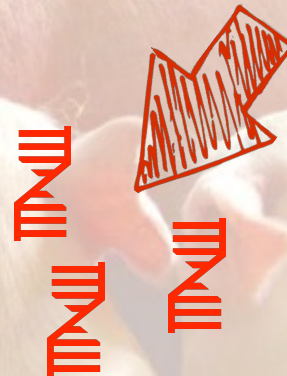

We used xenobiotic microRNAs as tracers in human preterm neonates and piglets showing they...

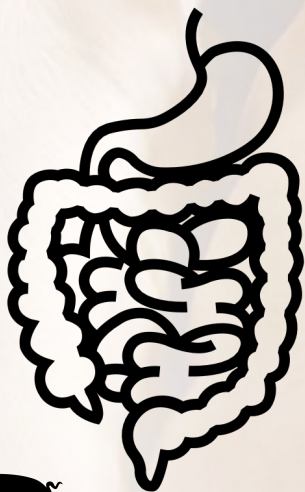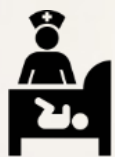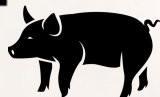

...are stable during GI passage.

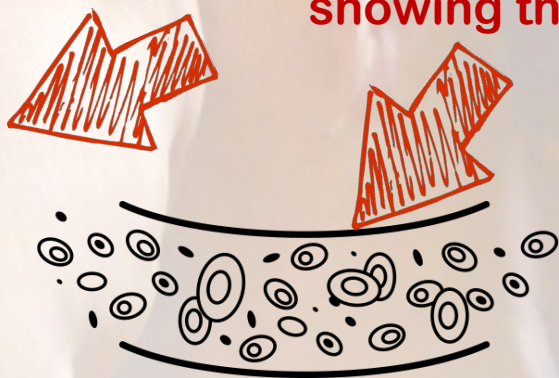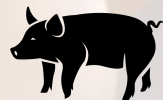

...accumulate in blood-stream post-feeding.

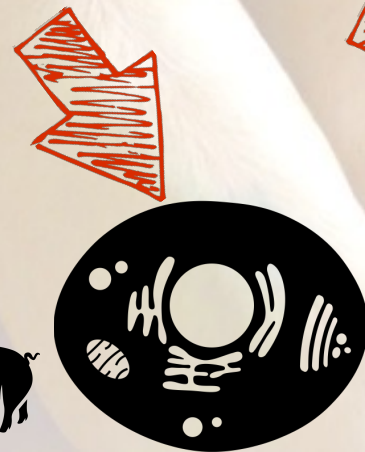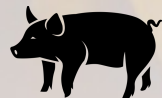

...are loaded to Ago2 in intestinal cells

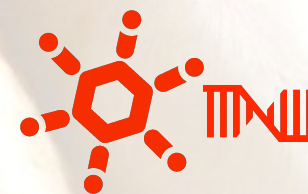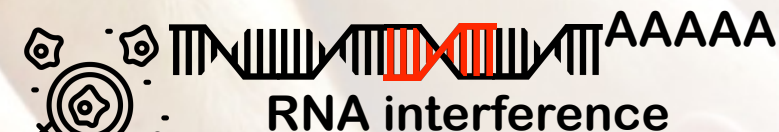

RNA interference  
...influence gene expression in primary intestinal cell culture upon Ad5-mediated microRNA gene transfer.
